# Supplementary material for: Synthesis, Cytotoxicity and Molecular Docking of New Hybrid Compounds by Combination of Curcumin with Oleanolic Acid
Source: MDPI journal article supplement (doi:10.3390/biomedicines11061506), 2023-05-23
Supplement: s1 [file s1]

## Supplementary Material

# Synthesis, Cytotoxicity and Molecular Docking of New Hybrid Compounds by Combination of Curcumin with Oleanolic Acid

Katarzyna Sowa-Kasprzak<sup>1\*</sup>, Ewa Totoń<sup>2</sup>, Jacek Kujawski<sup>1</sup>, Dorota Olender<sup>1</sup>, Natalia Lisiak<sup>2</sup>, Lucjusz Zaprutko<sup>1</sup> Błażej Rubiś<sup>2</sup>, Mariusz Kaczmarek<sup>3</sup>, Anna Pawełczyk<sup>1</sup>

<sup>1</sup> Chair and Department of Organic Chemistry, Poznan University of Medical Sciences, Grunwaldzka 6 Str., 60-780 Poznań, Poland

<sup>2</sup> Department of Clinical Chemistry and Molecular Diagnostics, Poznan University of Medical Sciences, Rokietnicka 3 Str., 60-806 Poznań, Poland; etoton@ump.edu.pl (E.T.)

<sup>3</sup> Department of Cancer Diagnostics and Immunology, Gene Therapy Unit, Greater Poland Cancer Centre, Garbary 15 Str., 61-866, Poznań, Poland

\* Correspondence: kasik@ump.edu.pl (K.S.K.)

## Table of Contents

| Contents                                                                   | Page No. |
|----------------------------------------------------------------------------|----------|
| 1. The first poses of the docked ligands to compounds <b>KS1–KS8</b>       |          |
| - 4kik.pdb protein (Figure S1-S9)                                          | S2       |
| - 2w96.pdb protein (Figure S10-S18)                                        | S11      |
| - 3dt3.pdb protein (Figure S19-S26)                                        | S20      |
| - 1l2j.pdb protein (Figure S27-S35)                                        | S29      |
| 2. <sup>1</sup> H-NMR and <sup>13</sup> C-NMR of the synthesized compounds | S38      |

## KS1

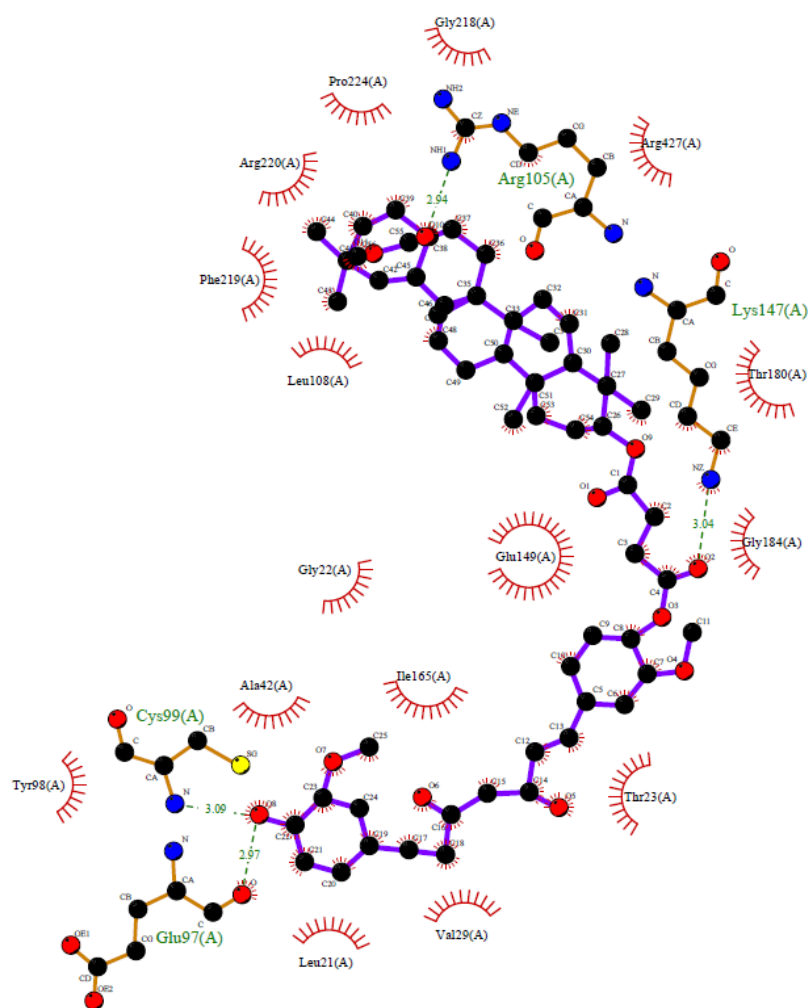

**Figure S1** The first poses of the docked ligands to compound **KS1**; hydrogen atoms are omitted; 4kik.pdb protein (LigPlot+ v.2.2 software).

## KS2\_keto

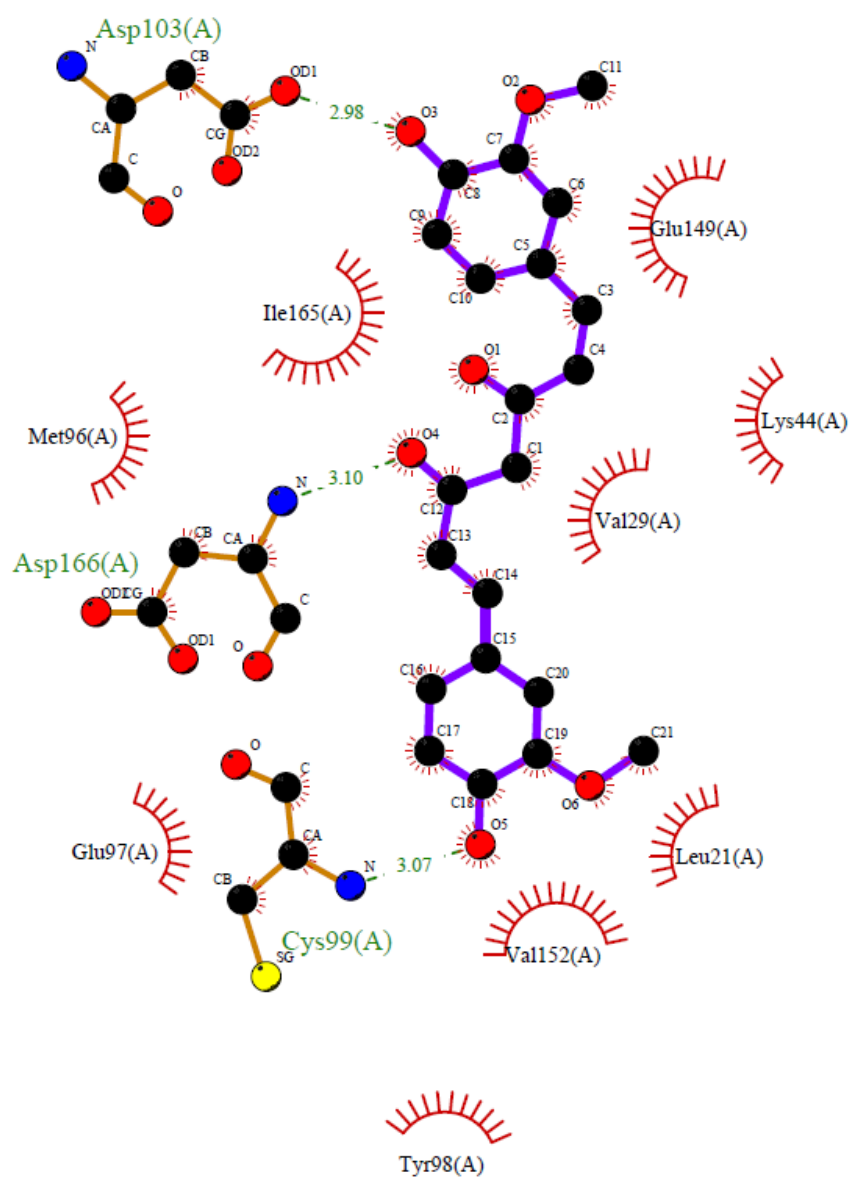

**Figure S2** The first poses of the docked ligands to compound **KS2\_keto**; hydrogen atoms are omitted; 4kik.pdb protein (LigPlot+ v.2.2 software).

## KS2\_enol

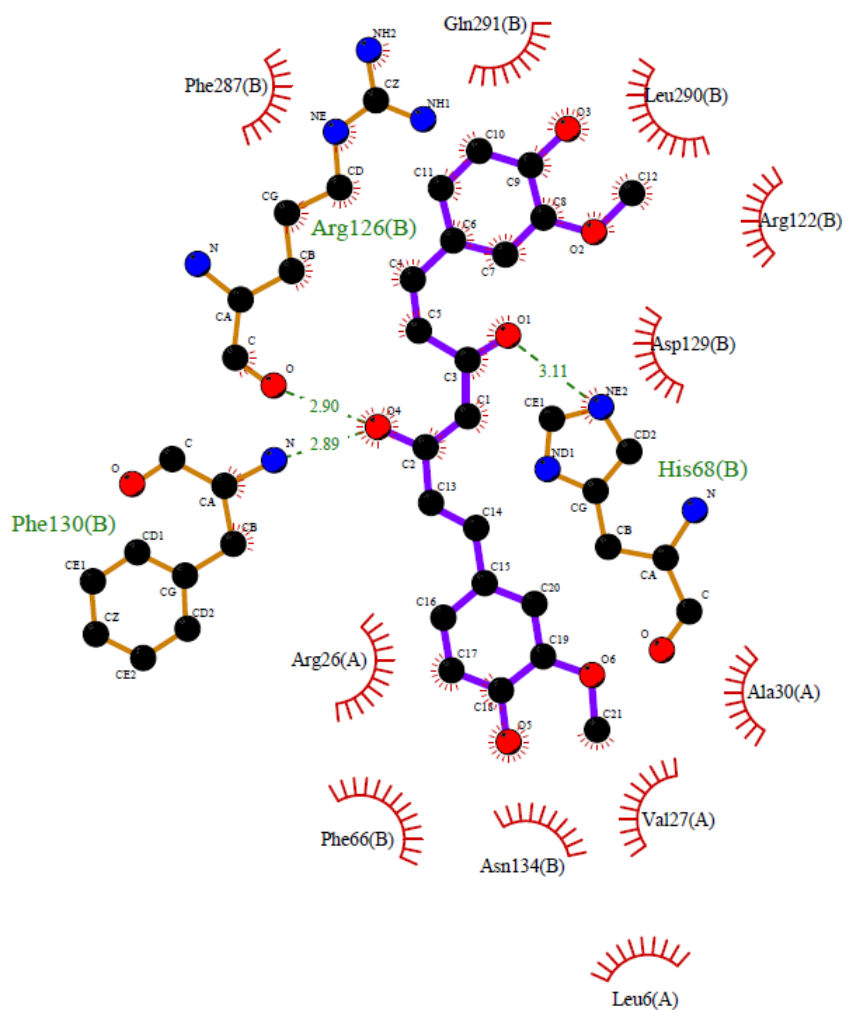

**Figure S3** The first poses of the docked ligands to compound **KS2\_enol**; hydrogen atoms are omitted; 4kik.pdb protein (LigPlot+ v.2.2 software).

## KS3

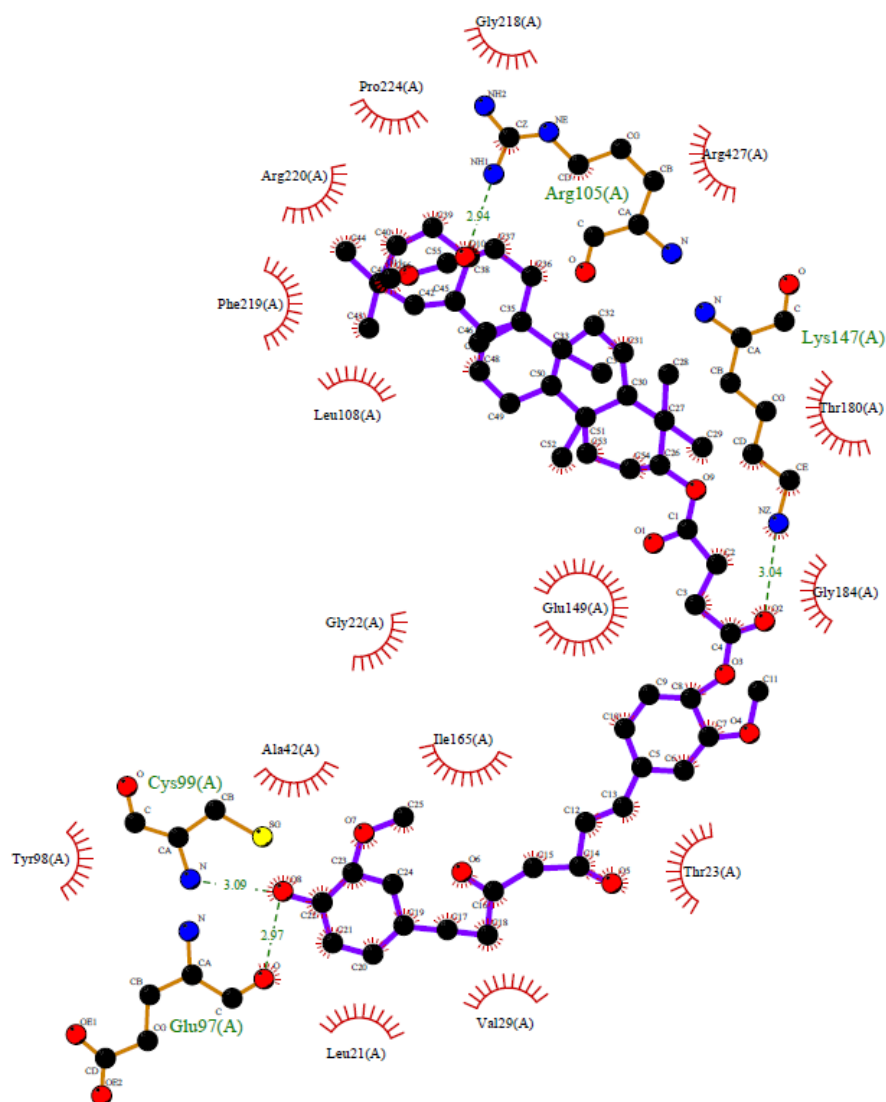

**Figure S4** The first poses of the docked ligands to compound **KS3**; hydrogen atoms are omitted; 4kik.pdb protein (LigPlot+ v.2.2 software).

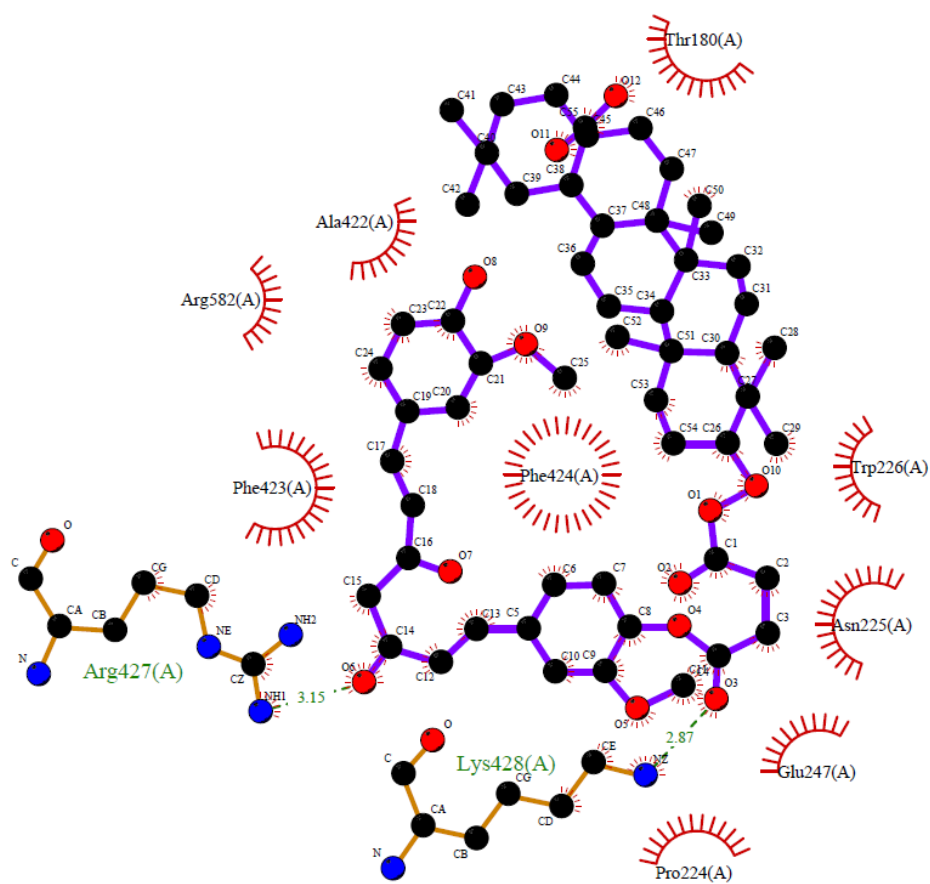

**Figure S5** The first poses of the docked ligands to compound **KS4**; hydrogen atoms are omitted; 4kik.pdb protein (LigPlot+ v.2.2 software).

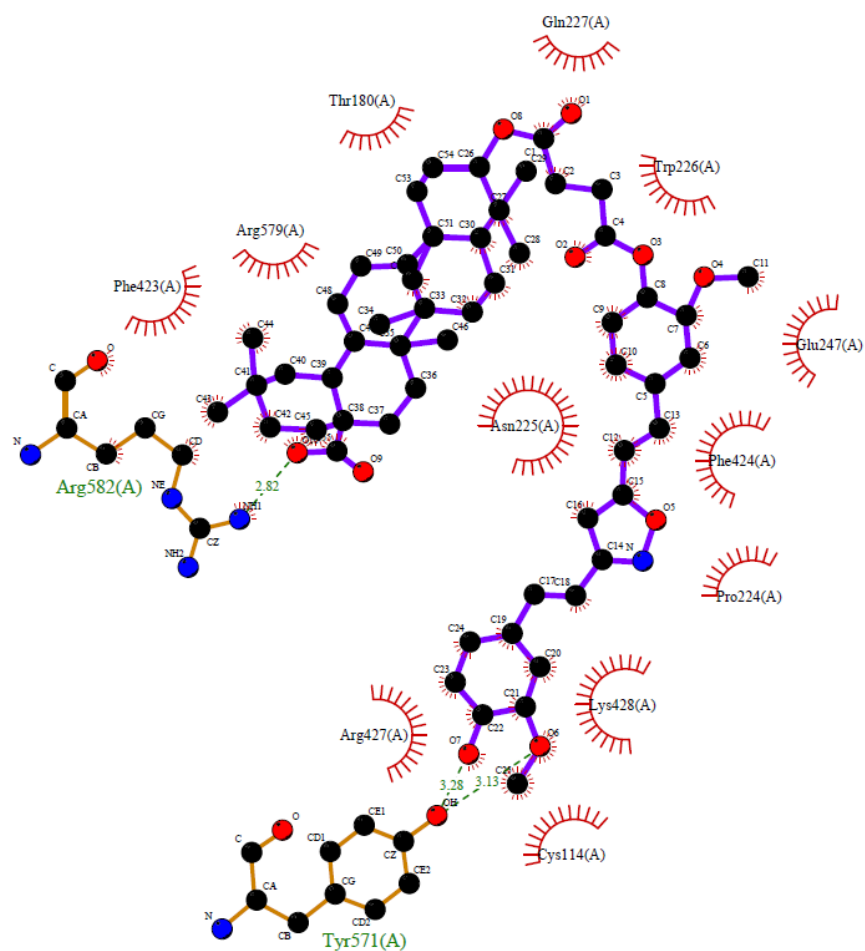

**Figure S6** The first poses of the docked ligands to compound **KS5**; hydrogen atoms are omitted; 4kik.pdb protein (LigPlot+ v.2.2 software).

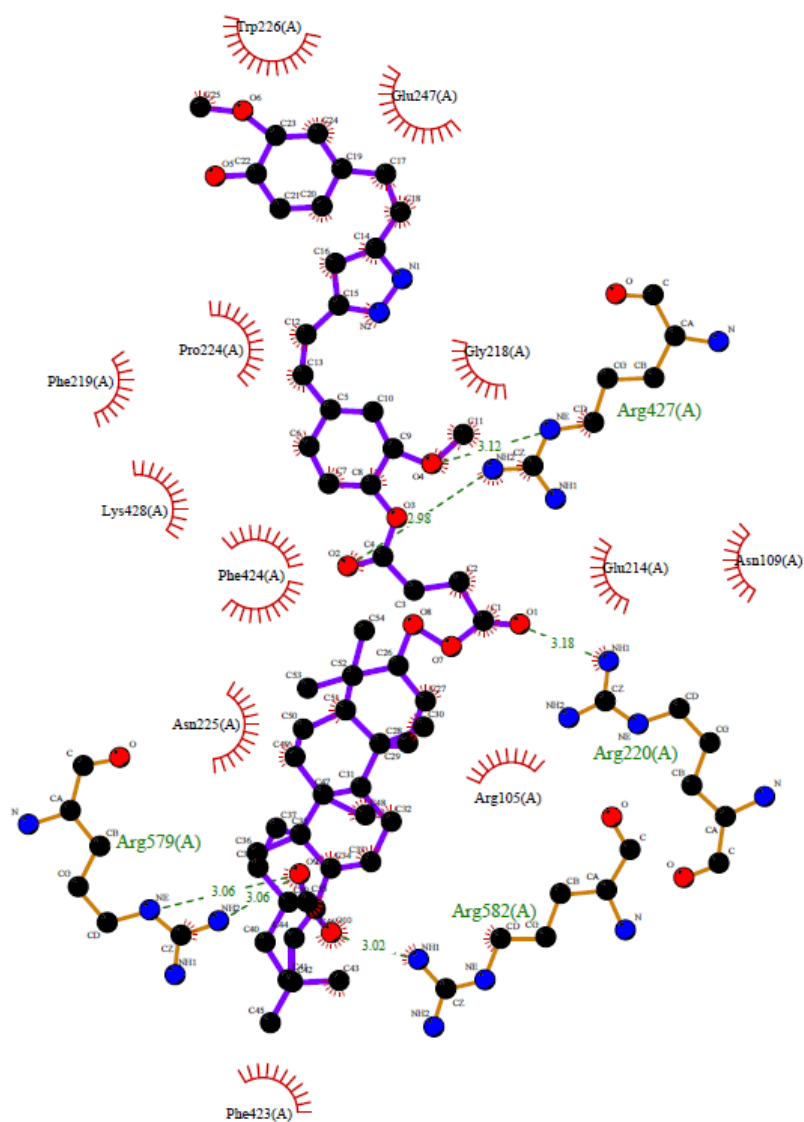

**Figure S7** The first poses of the docked ligands to compound **KS6**; hydrogen atoms are omitted; 4kik.pdb protein (LigPlot+ v.2.2 software).

## KS7

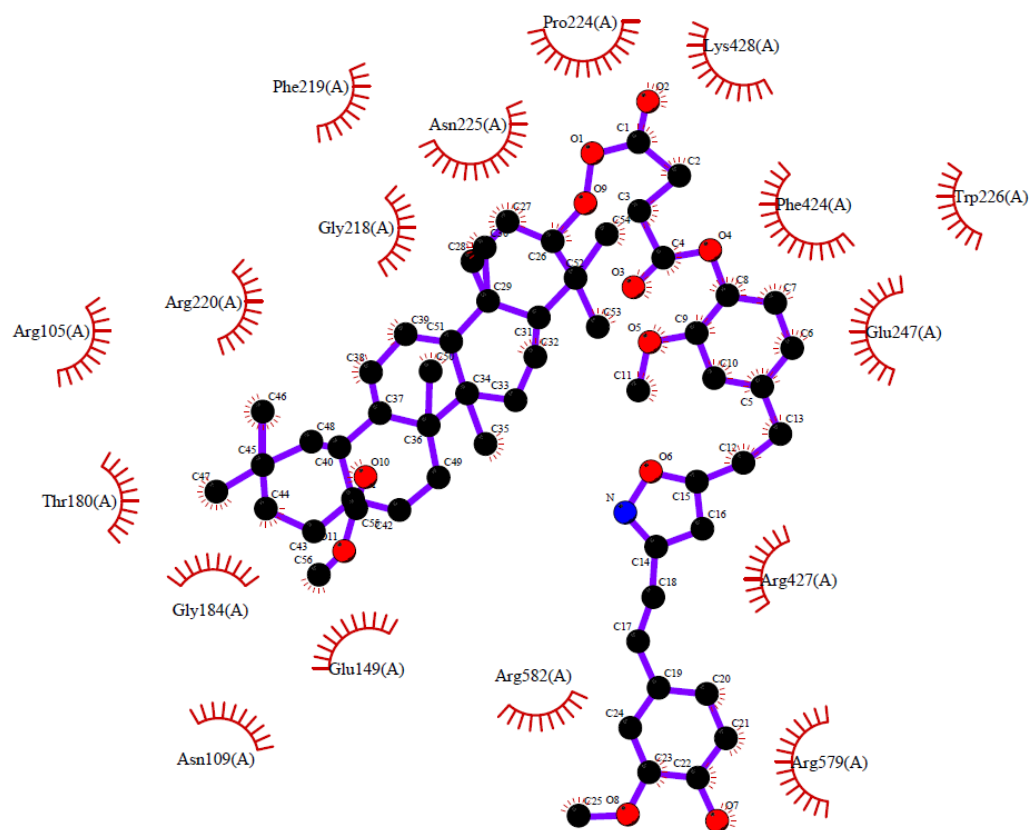

**Figure S8** The first poses of the docked ligands to compound **KS7**; hydrogen atoms are omitted; 4kik.pdb protein (LigPlot+ v.2.2 software).

## KS8

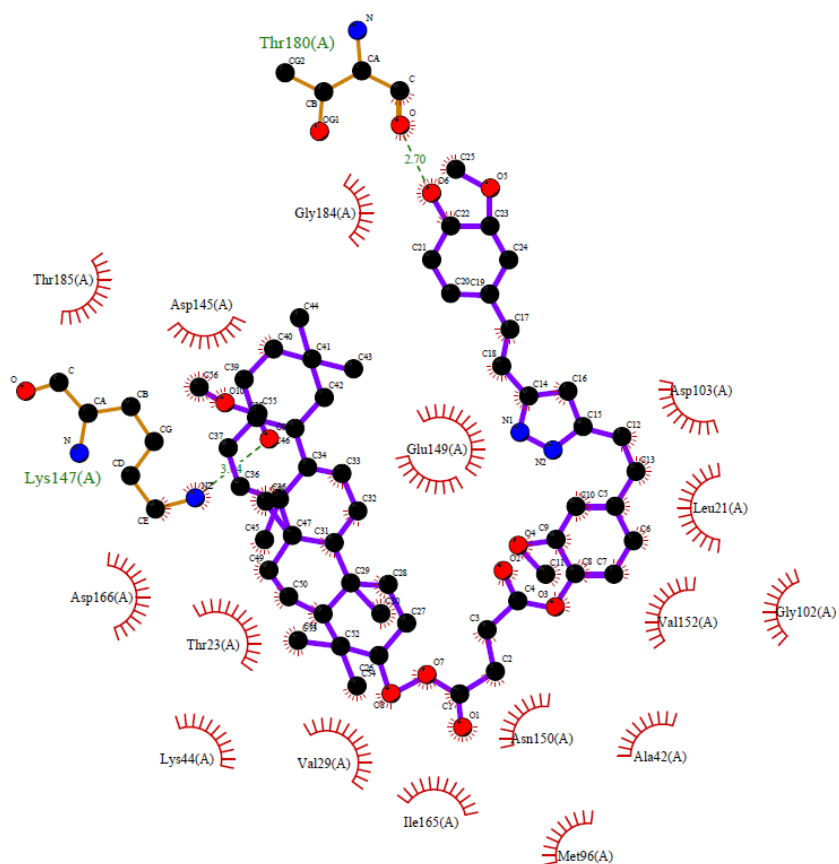

**Figure S9** The first poses of the docked ligands to compound **KS8**; hydrogen atoms are omitted; 4kik.pdb protein (LigPlot+ v.2.2 software).

## KS1

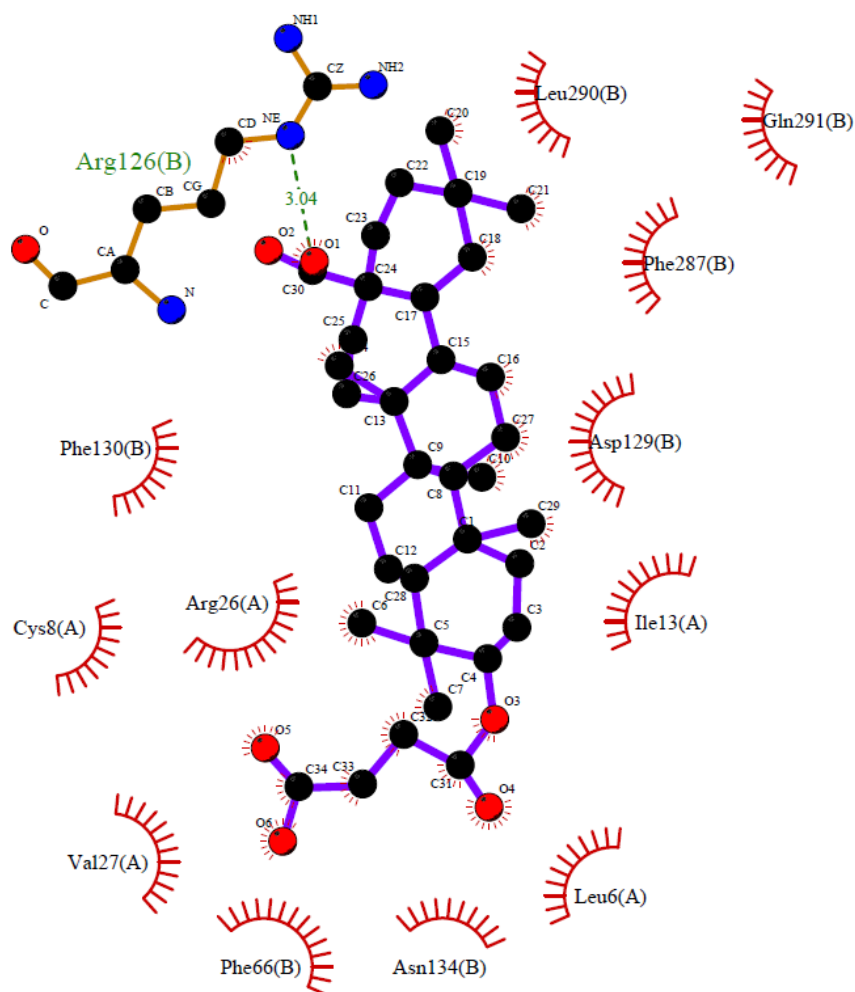

**Figure S10** The first poses of the docked ligands to compound **KS1**; hydrogen atoms are omitted; 2w96.pdb protein (LigPlot+ v.2.2 software).

## KS2\_keto

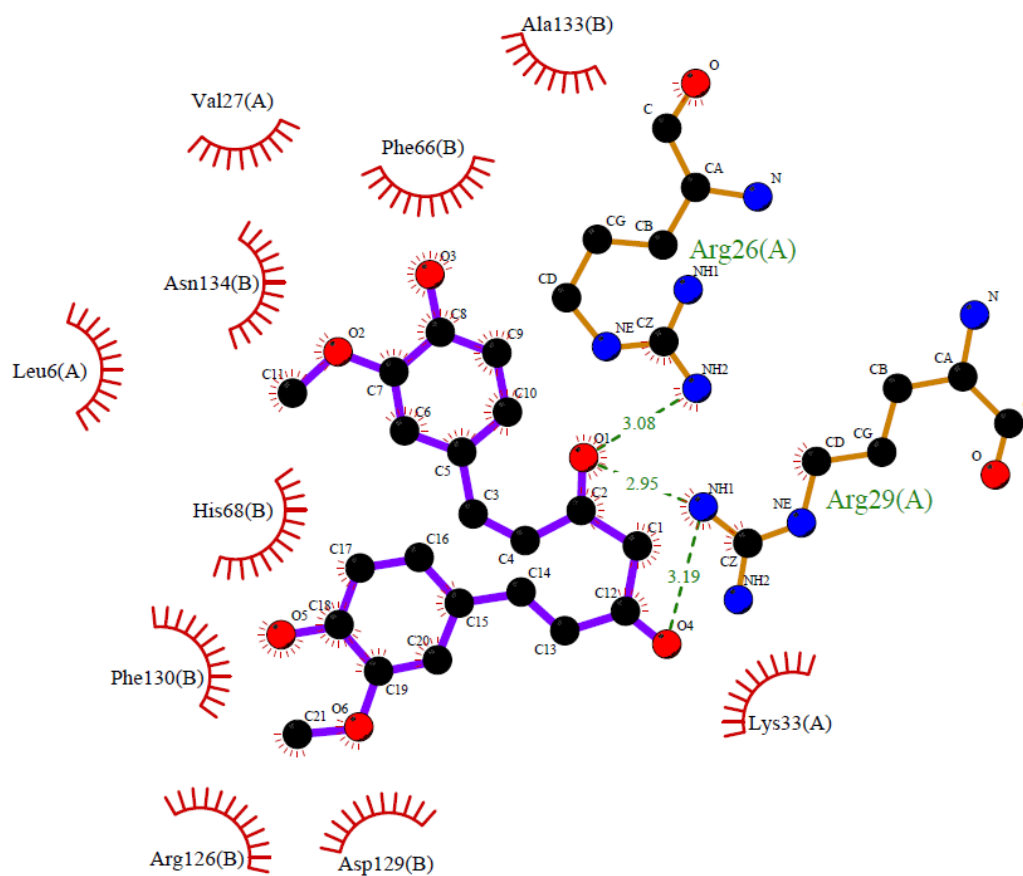

**Figure S11** The first poses of the docked ligands to compound **KS2\_keto**; hydrogen atoms are omitted; 2w96.pdb protein (LigPlot+ v.2.2 software).

## KS2\_enol

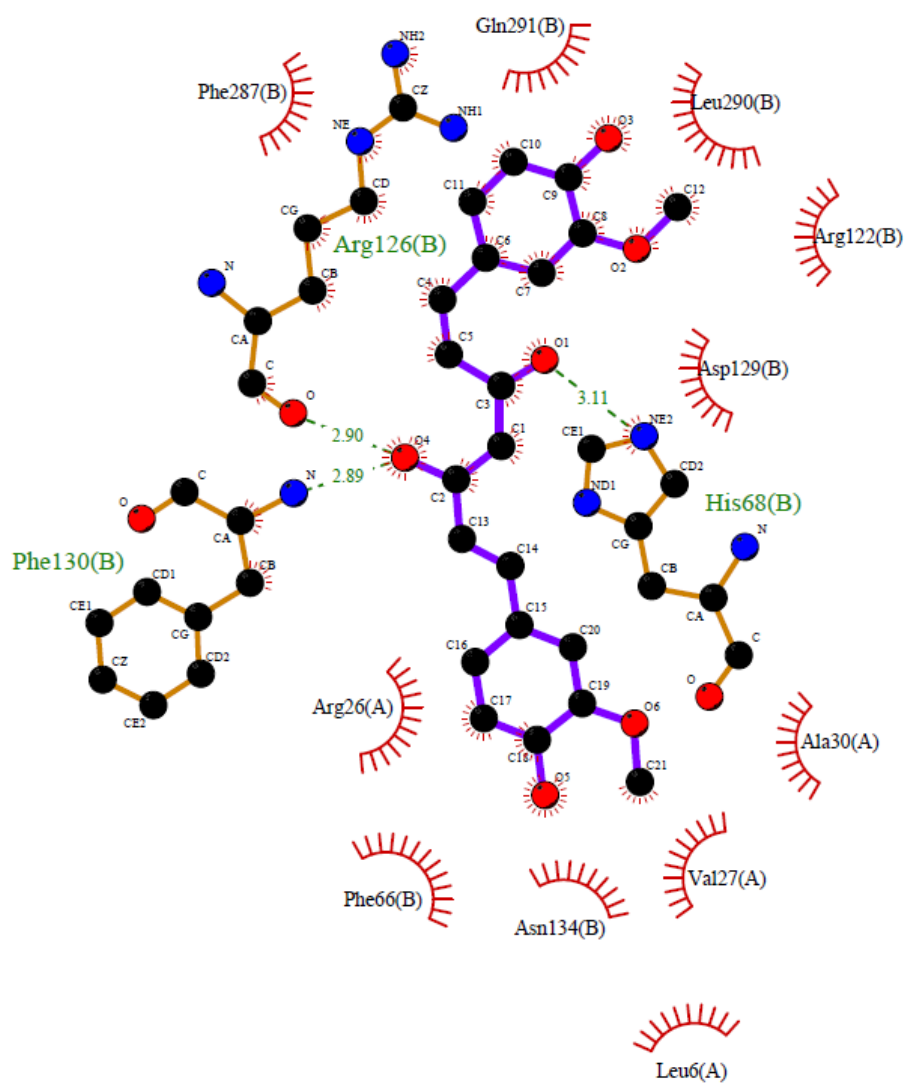

**Figure S12** The first poses of the docked ligands to compound **KS2\_enol**; hydrogen atoms are omitted; 2w96.pdb protein (LigPlot+ v.2.2 software).

## KS3

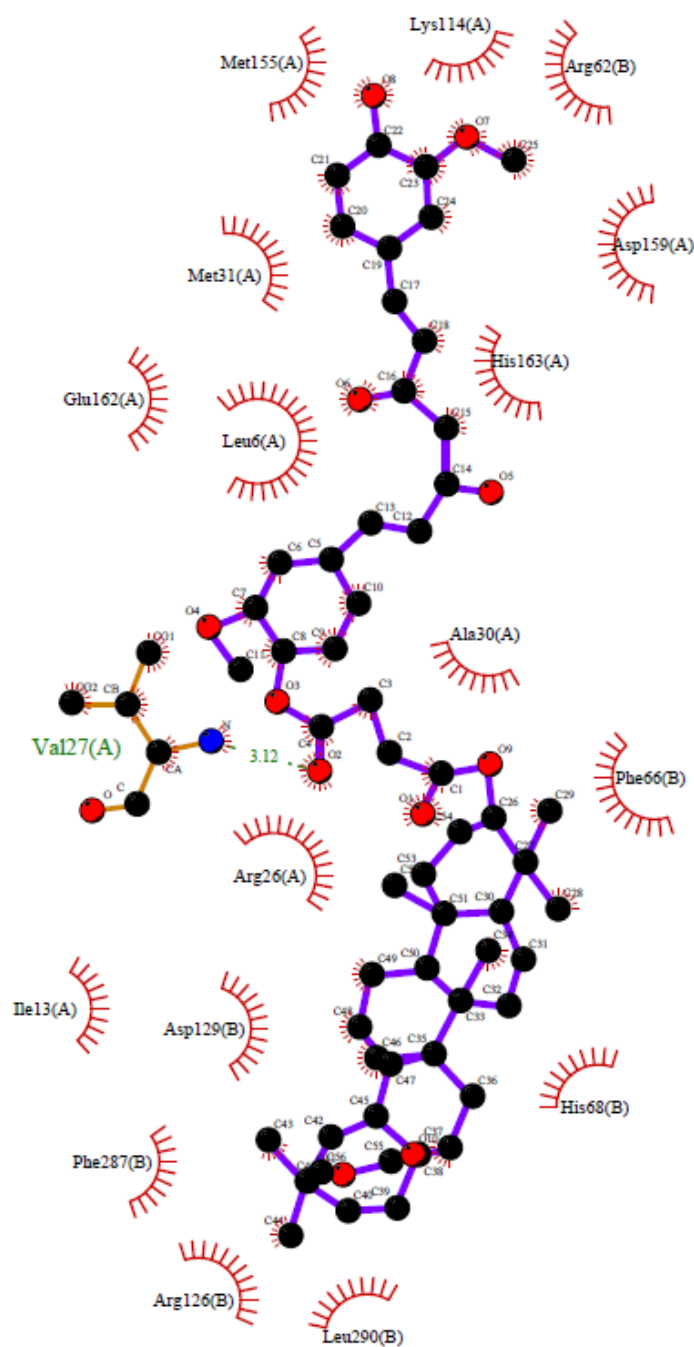

**Figure S13.** The first poses of the docked ligands to compound **KS3**; hydrogen atoms are omitted; 2w96.pdb protein (LigPlot+ v.2.2 software).

## KS4

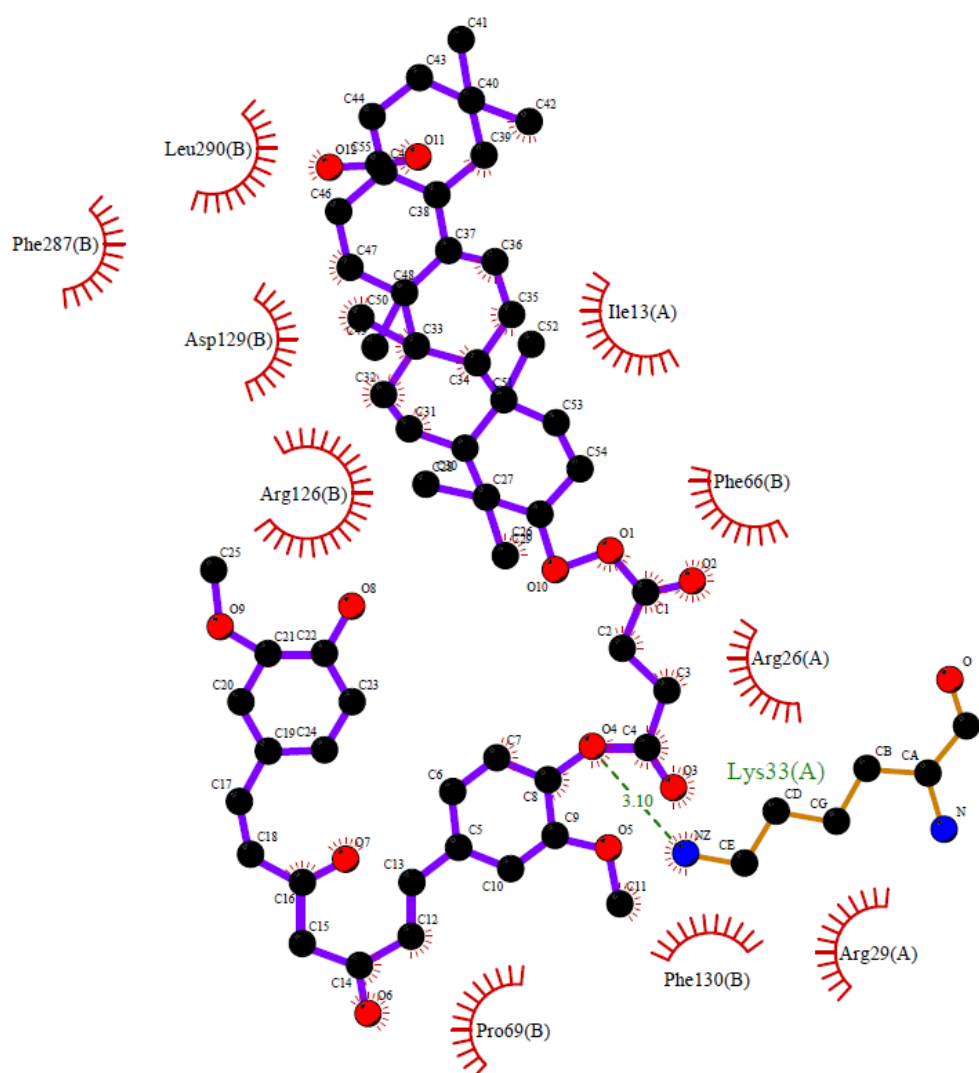

**Figure S14** The first poses of the docked ligands to compound **KS4**; hydrogen atoms are omitted; 2w96.pdb protein (LigPlot+ v.2.2 software).

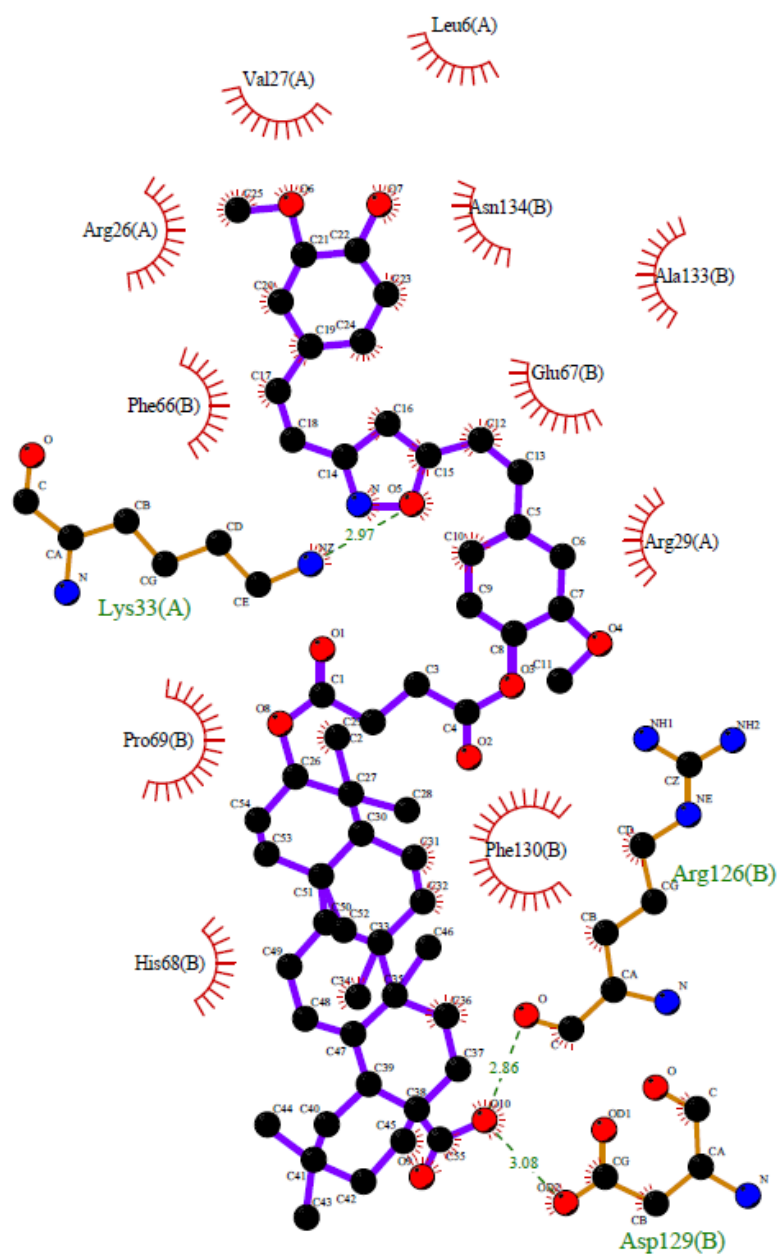

**Figure S15** The first poses of the docked ligands to compound **KS5**; hydrogen atoms are omitted; 2w96.pdb protein (LigPlot+ v.2.2 software).

## KS6

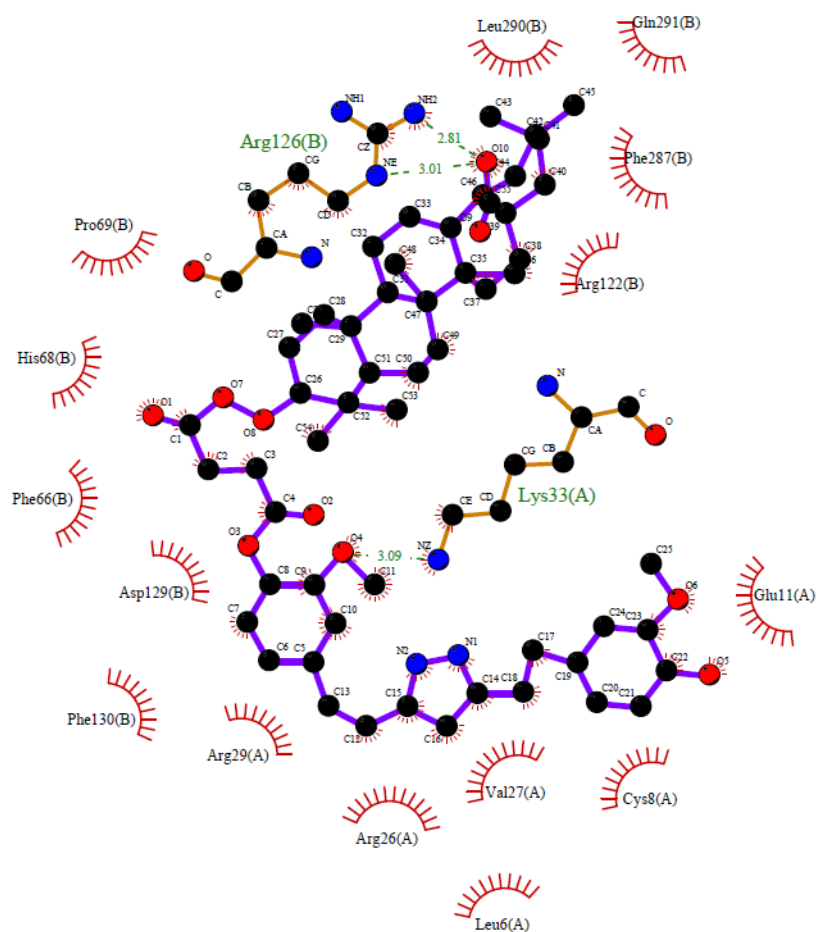

**Figure S16** The first poses of the docked ligands to compound **KS6**; hydrogen atoms are omitted; 2w96.pdb protein (LigPlot+ v.2.2 software).

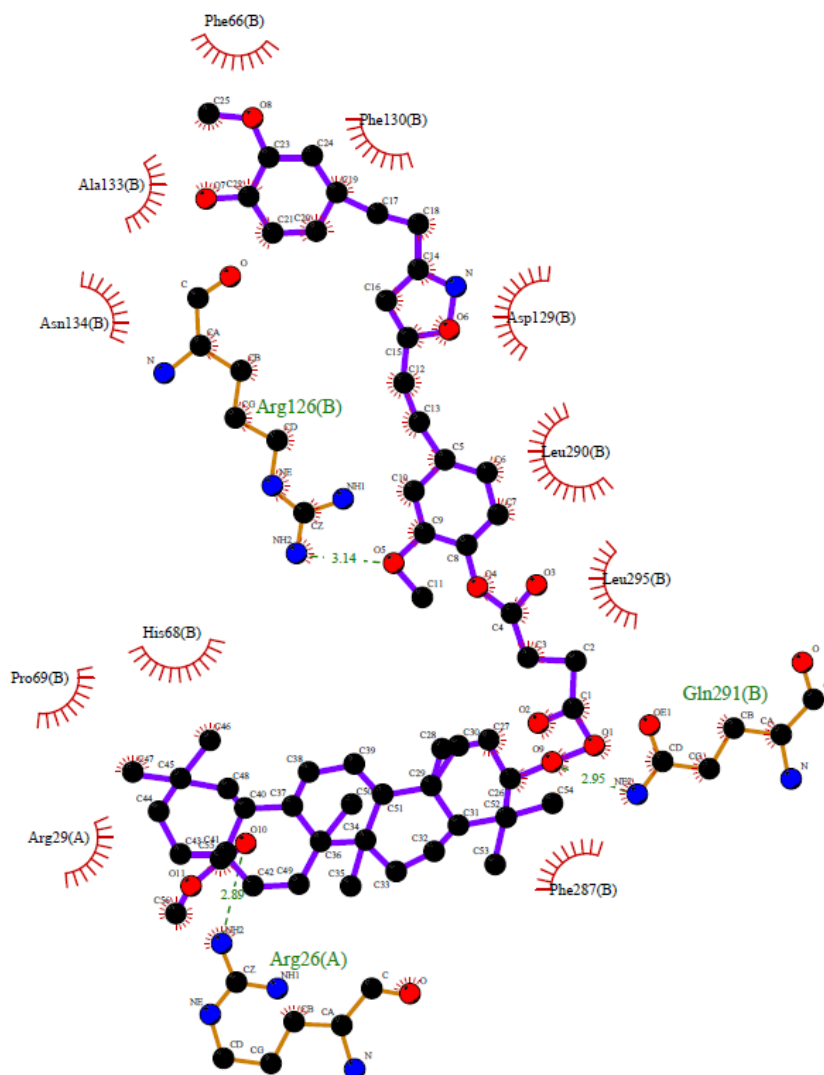

**Figure S17** The first poses of the docked ligands to compound **KS7**; hydrogen atoms are omitted; 2w96.pdb protein (LigPlot+ v.2.2 software).

## KS8

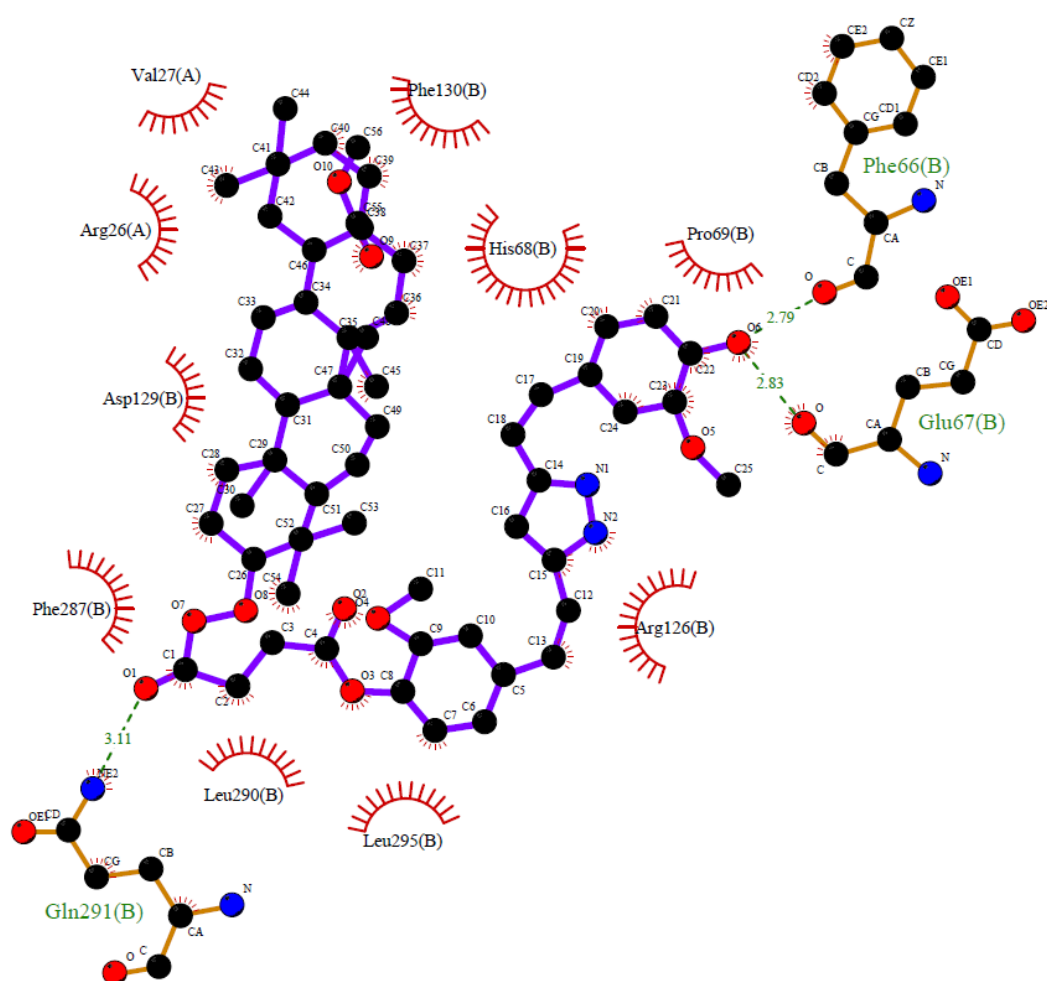

**Figure S18** The first poses of the docked ligands to compound **KS8**; hydrogen atoms are omitted; 2w96.pdb protein (LigPlot+ v.2.2 software).

## KS1

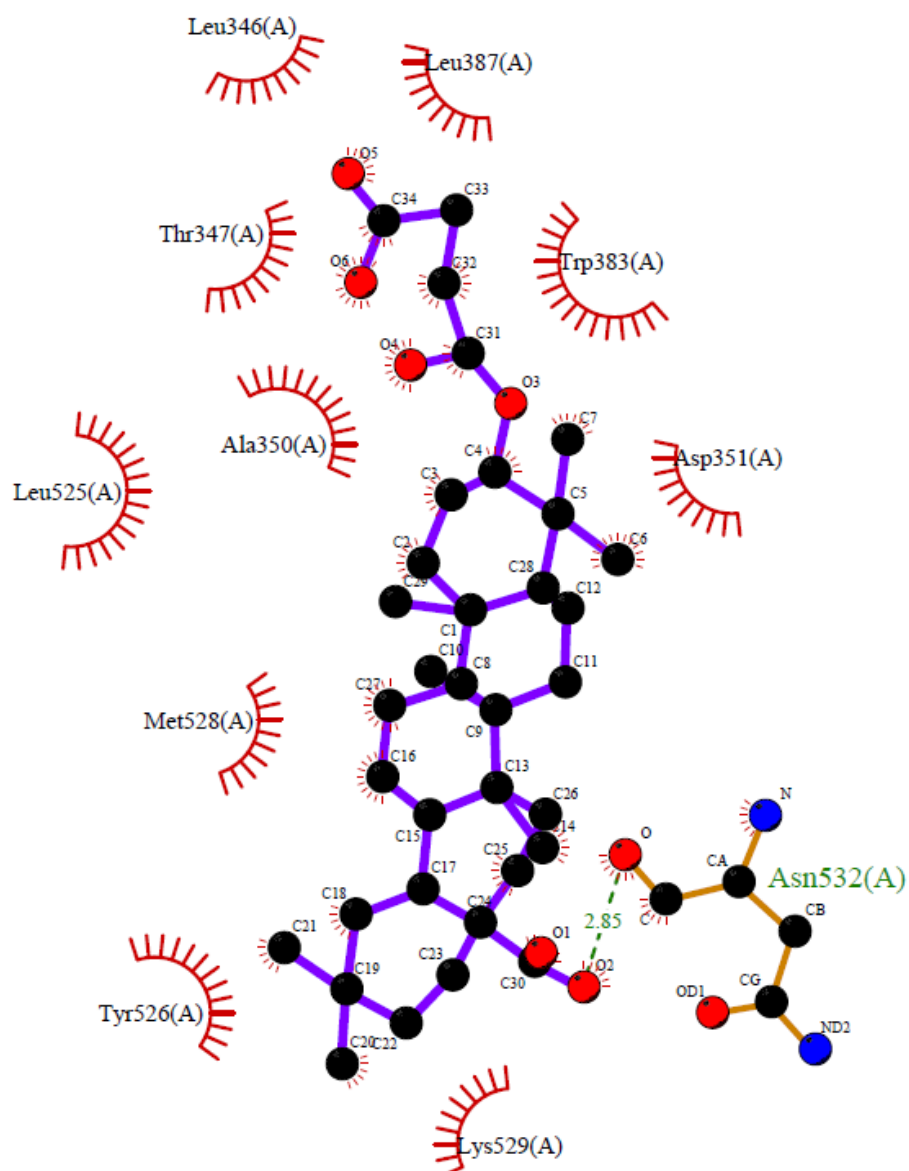

**Figure S19** The first poses of the docked ligands to compound **KS1**; hydrogen atoms are omitted; 3dt3.pdb protein (LigPlot+ v.2.2 software).

**KS2\_keto**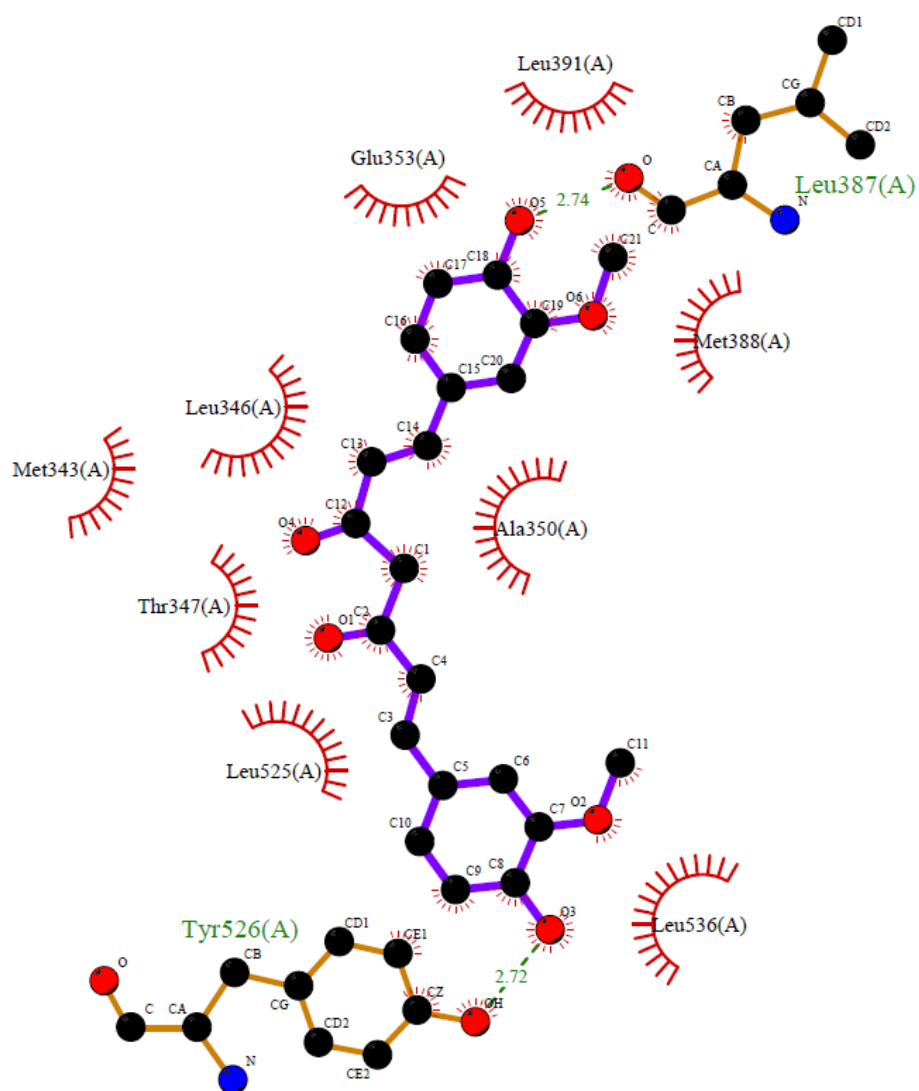

**Figure S20a** The first poses of the docked ligands to compound **KS2\_keto**; hydrogen atoms are omitted; 3dt3.pdb protein (LigPlot+ v.2.2 software).

**Figure S20b** The first poses of the docked ligands to compound **KS2\_enol**; hydrogen atoms are omitted; 3dt3.pdb protein (LigPlot+ v.2.2 software).

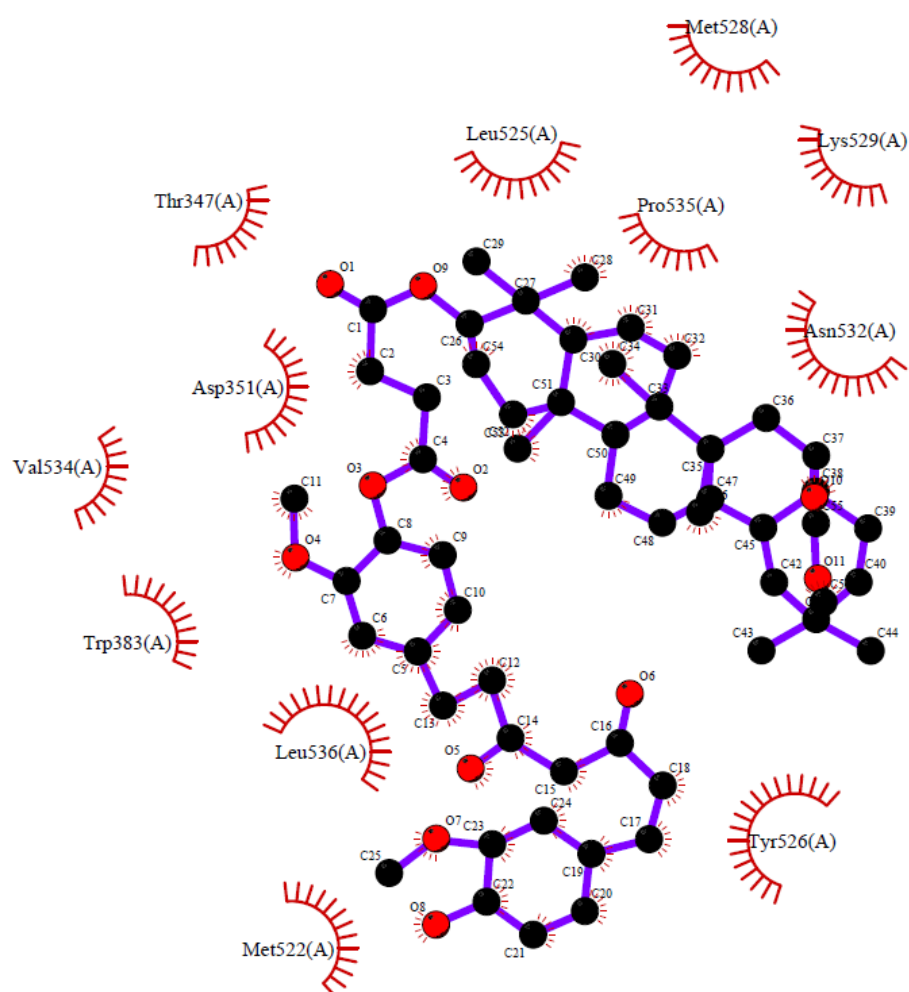

**Figure S21** The first poses of the docked ligands to compound **KS3**; hydrogen atoms are omitted; 3dt3.pdb protein (LigPlot+ v.2.2 software).

## KS4

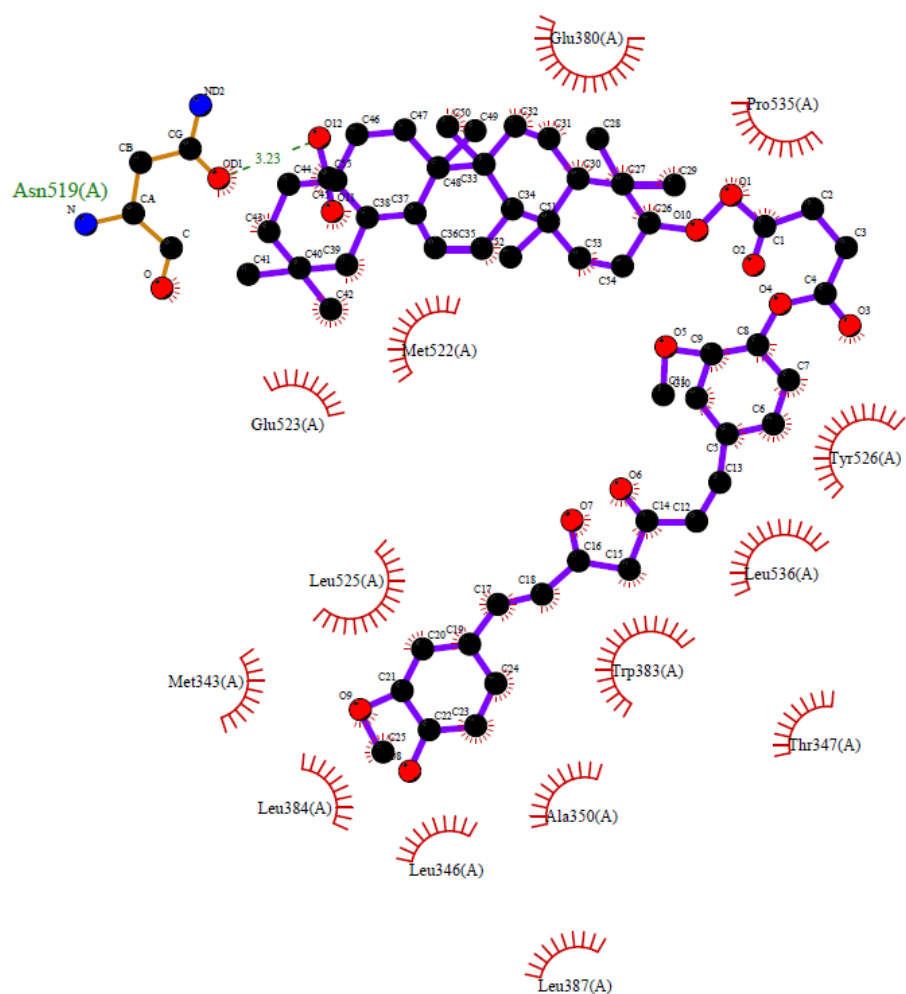

**Figure S22** The first poses of the docked ligands to compound **KS4**; hydrogen atoms are omitted; 3dt3.pdb protein (LigPlot+ v.2.2 software).

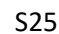

**Figure S23** The first poses of the docked ligands to compound **KS5**; hydrogen atoms are omitted; 3dt3.pdb protein (LigPlot+ v.2.2 software).

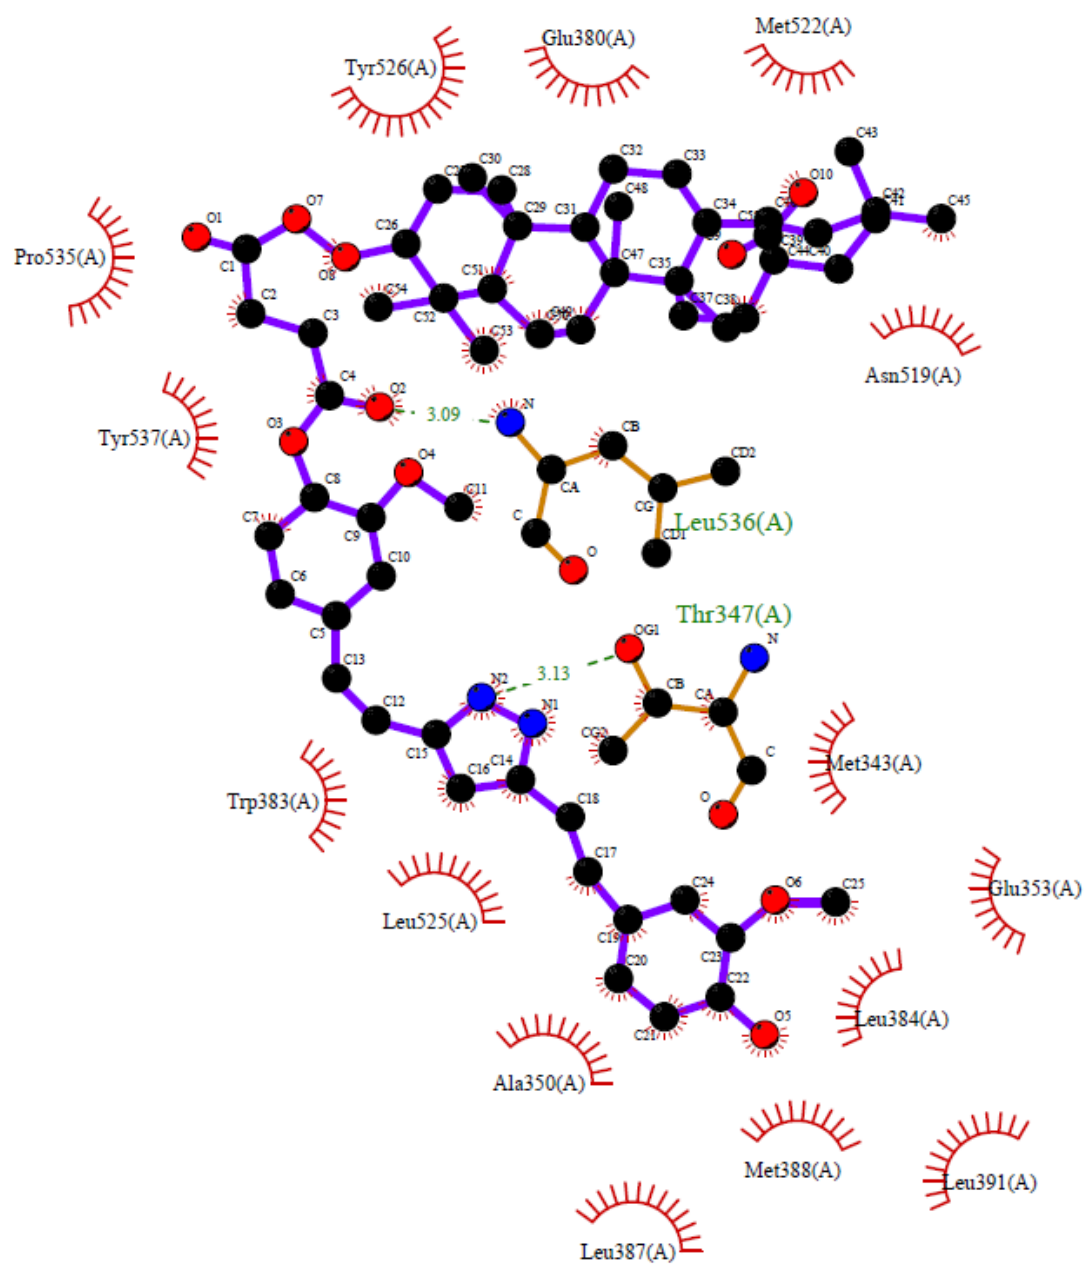

**Figure S24** The first poses of the docked ligands to compound **KS6**; hydrogen atoms are omitted; 3dt3.pdb protein (LigPlot+ v.2.2 software).

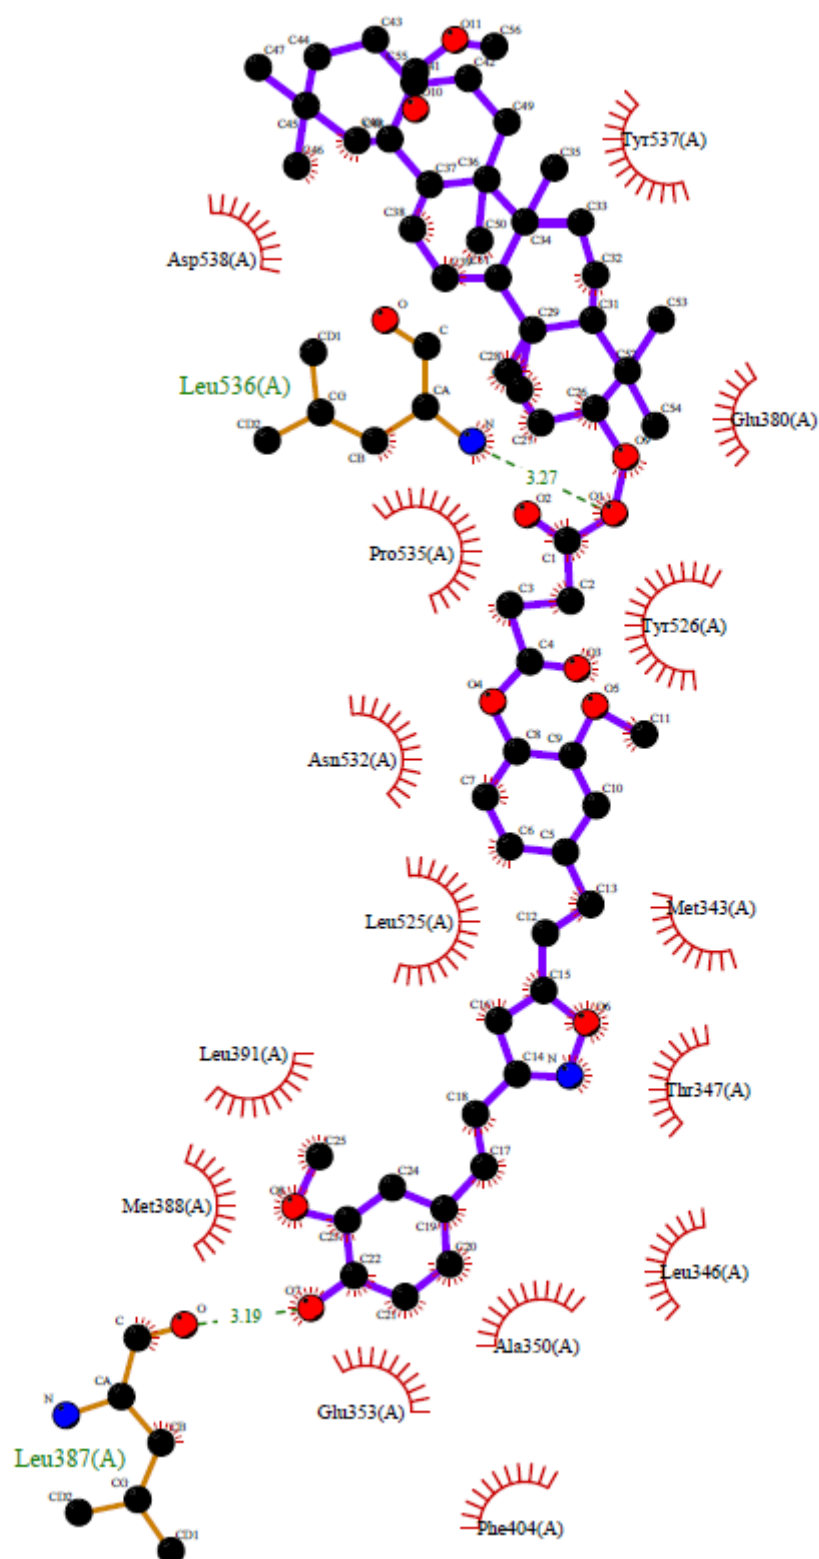

**Figure S25** The first poses of the docked ligands to compound **KS7**; hydrogen atoms are omitted; 3dt3.pdb protein (LigPlot+ v.2.2 software).

## KS8

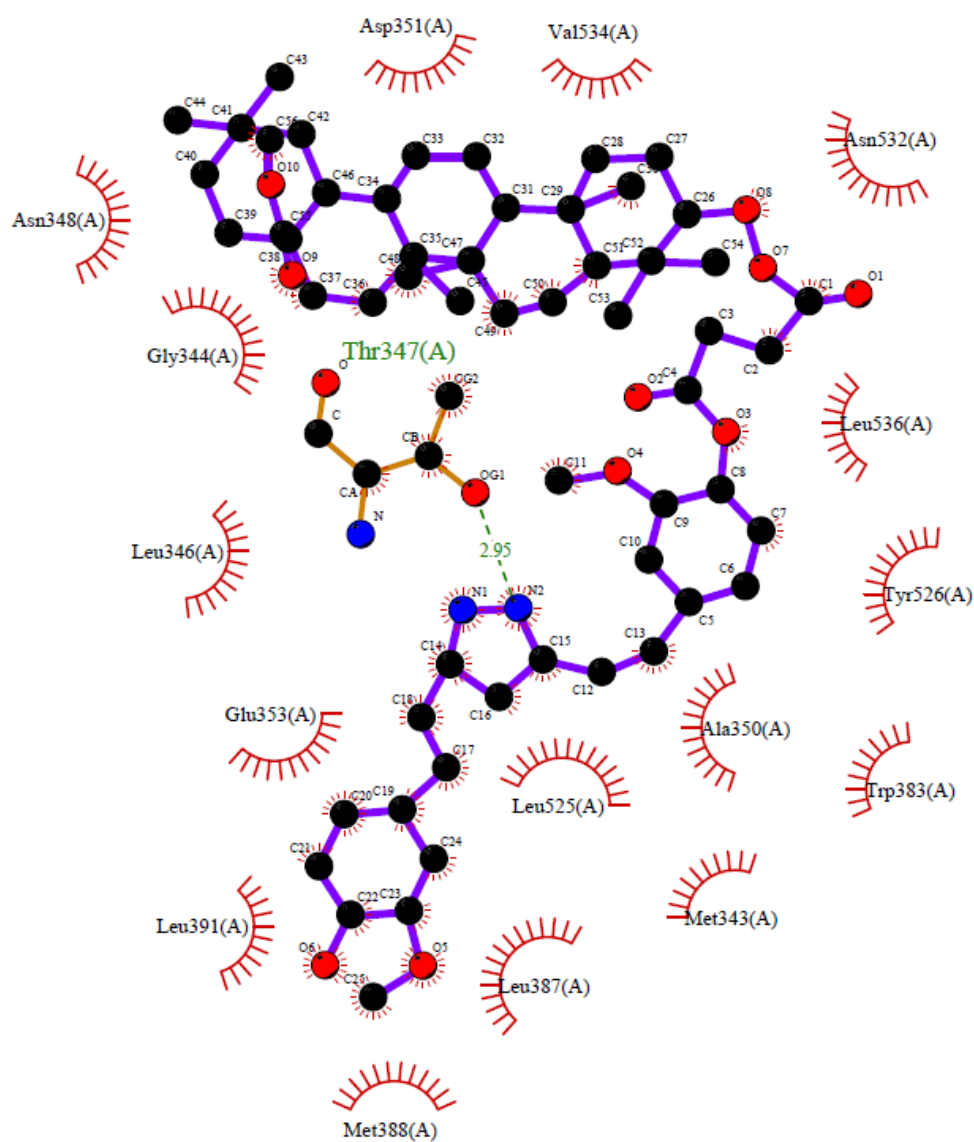

**Figure S26** The first poses of the docked ligands to compound **KS8**; hydrogen atoms are omitted; 3dt3.pdb protein (LigPlot+ v.2.2 software).

## KS1

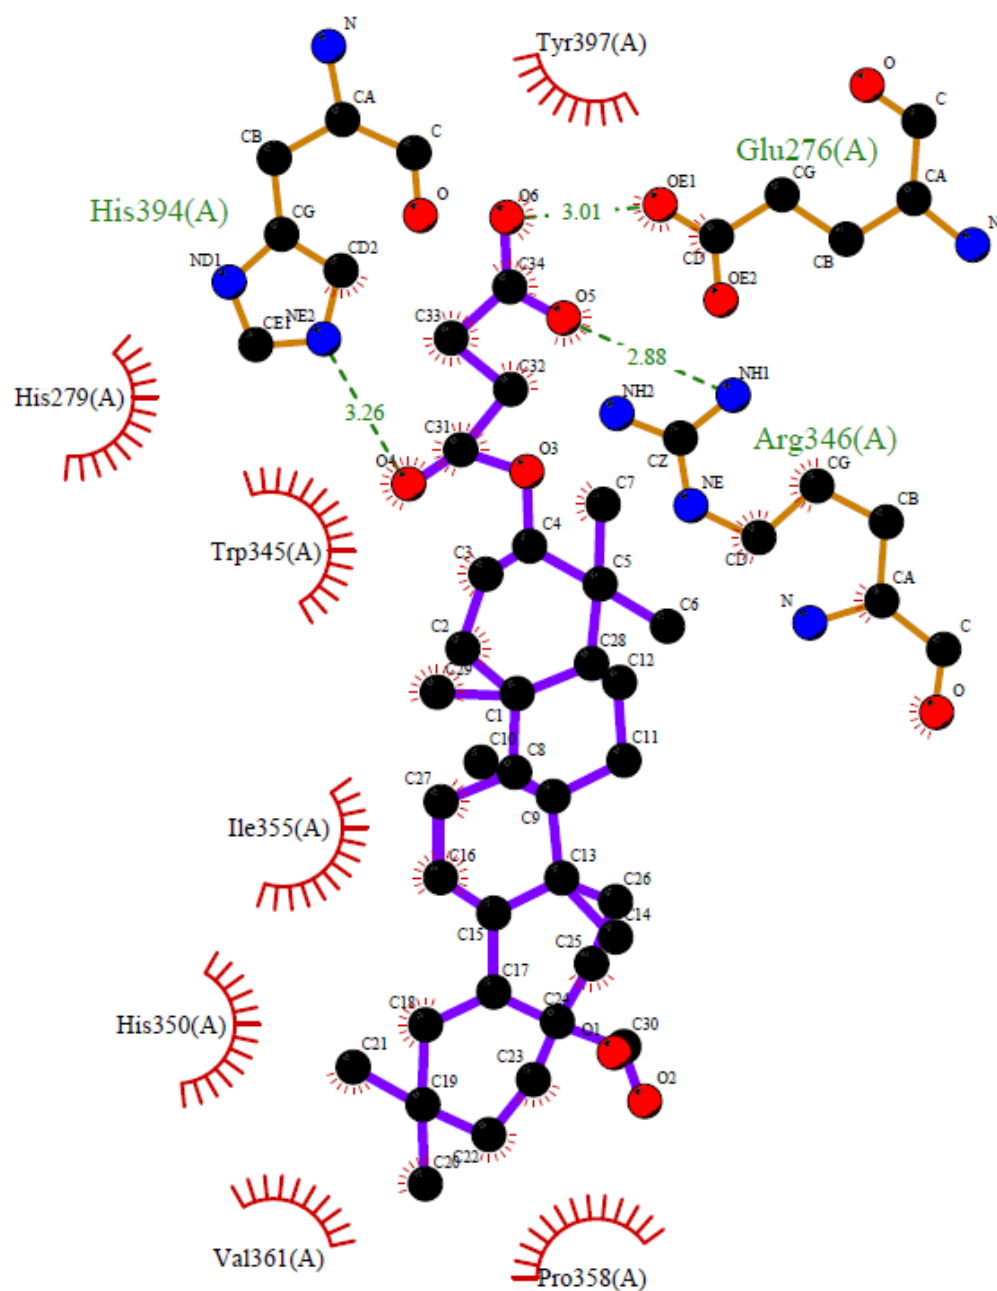

**Figure S27** The first poses of the docked ligands to compound **KS1**; hydrogen atoms are omitted; 112j.pdb protein (LigPlot+ v.2.2 software).

## KS2\_keto

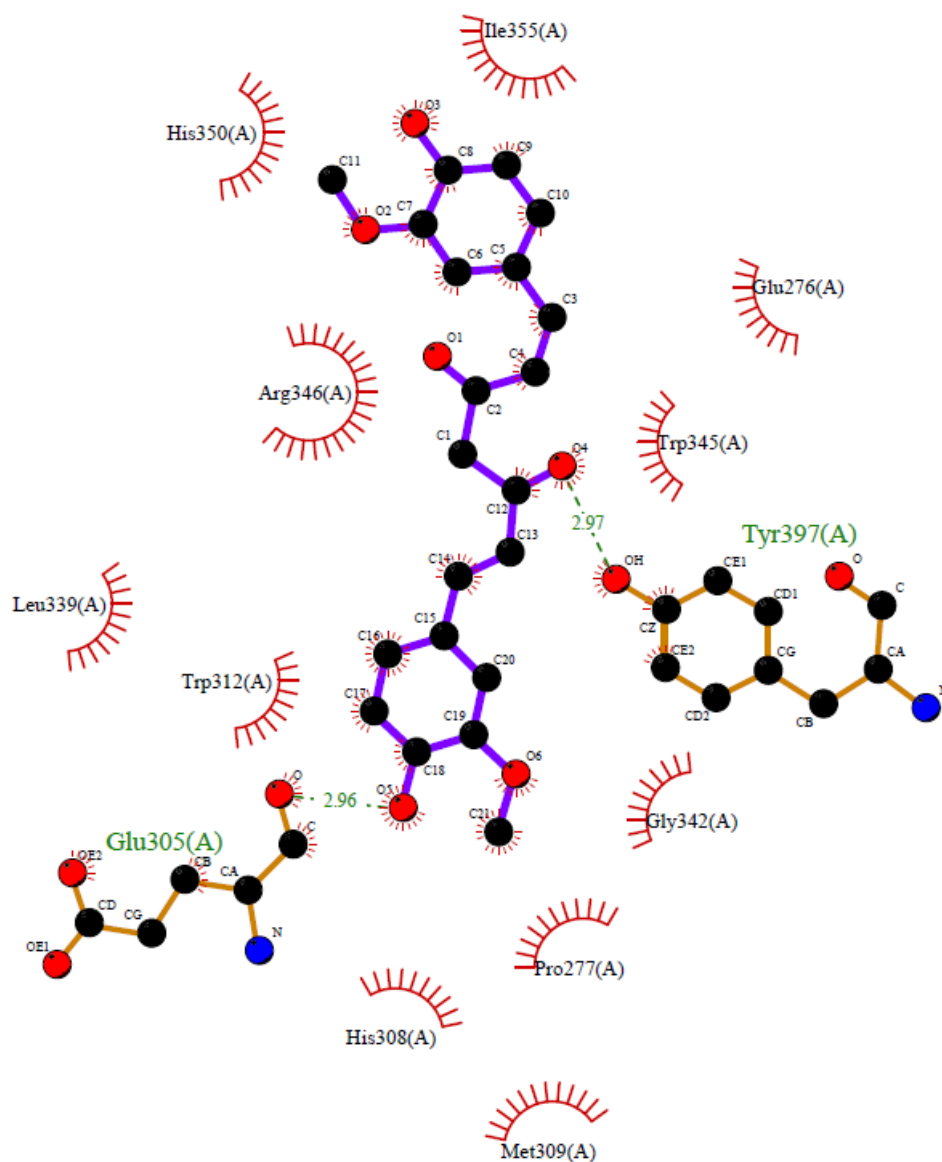

**Figure S28** The first poses of the docked ligands to compound **KS2\_keto**; hydrogen atoms are omitted; 112j.pdb protein (LigPlot+ v.2.2 software).

## KS2\_enol

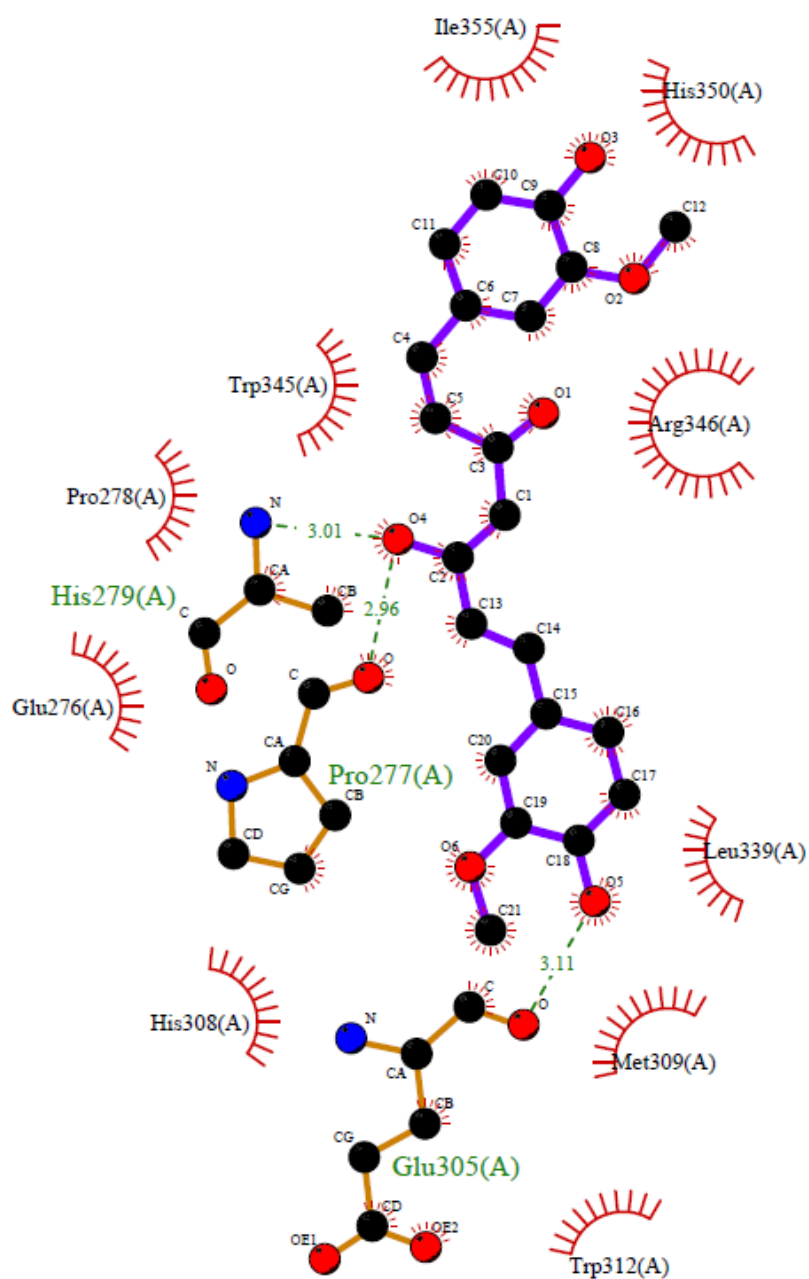

**Figure S29** The first poses of the docked ligands to compound **KS2\_enol**; hydrogen atoms are omitted; 112j.pdb protein (LigPlot+ v.2.2 software).

## KS3

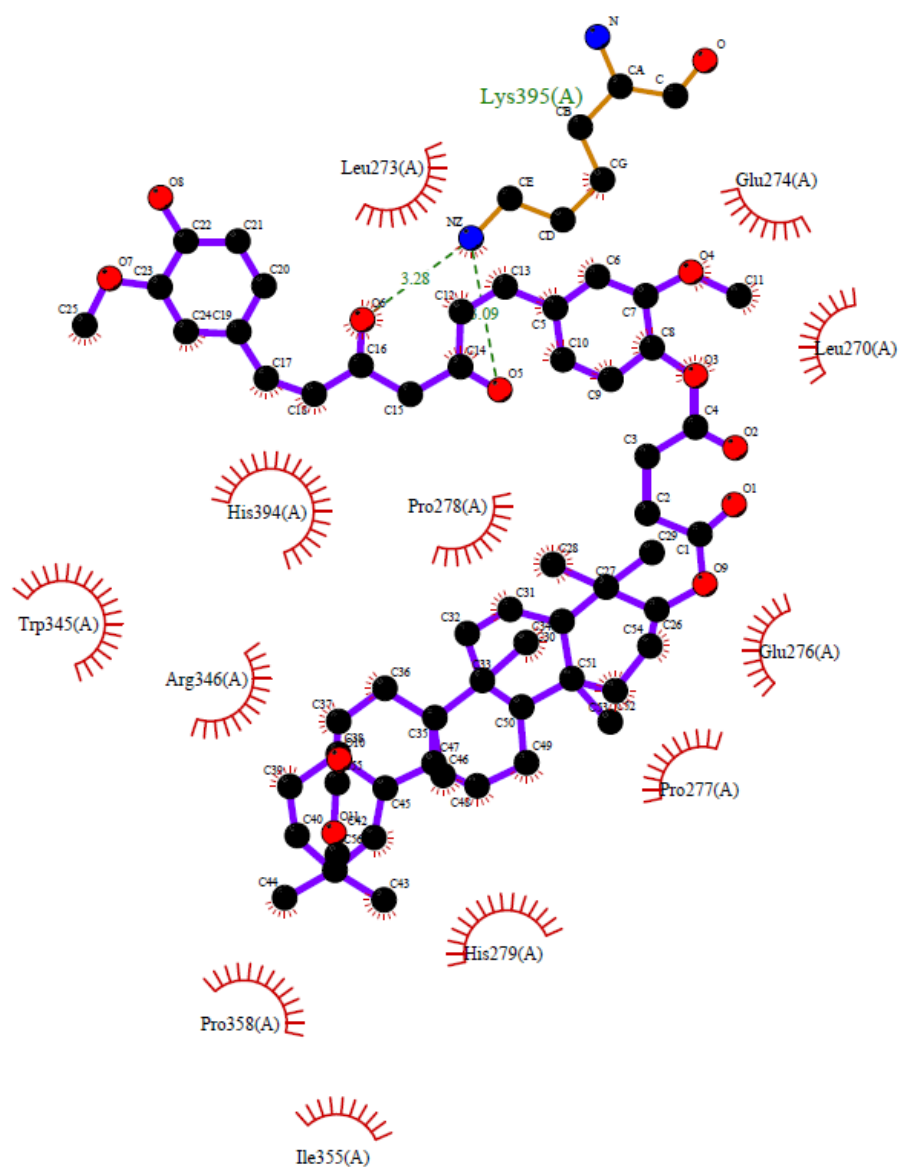

**Figure S30** The first poses of the docked ligands to compound **KS3**; hydrogen atoms are omitted; 112j.pdb protein (LigPlot+ v.2.2 software).

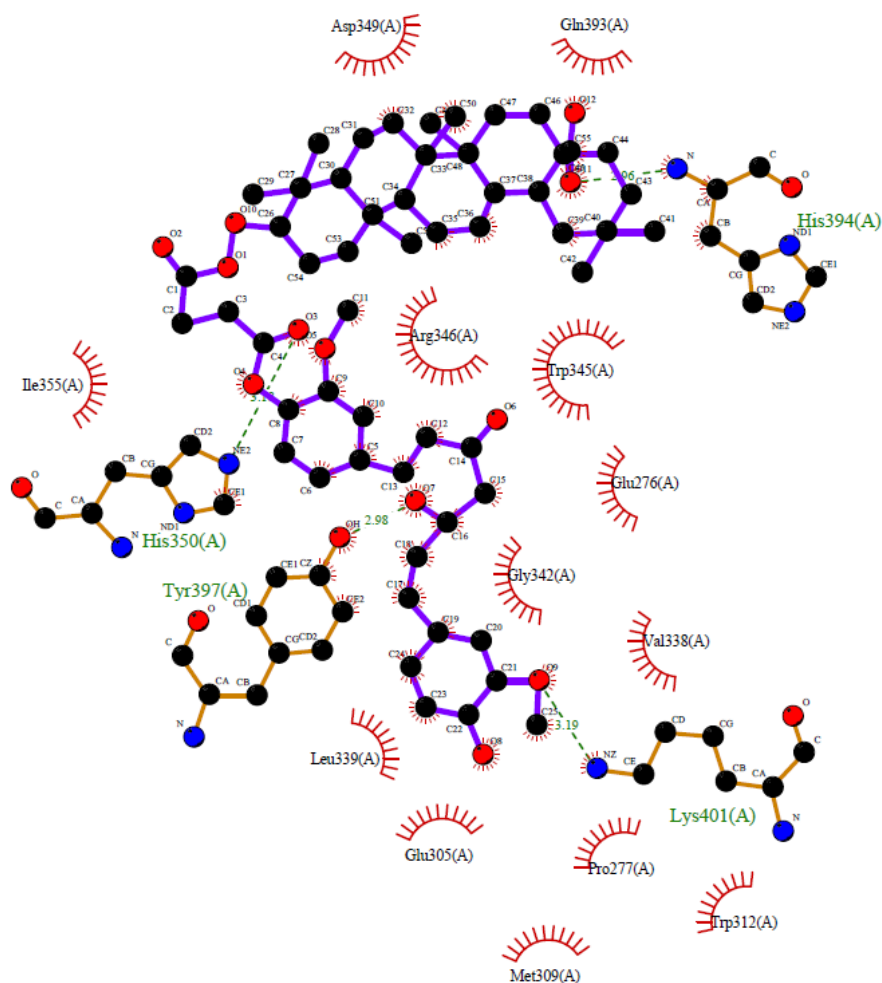

**Figure S31** The first poses of the docked ligands to compound **KS4**; hydrogen atoms are omitted; 112j.pdb protein (LigPlot+ v.2.2 software).

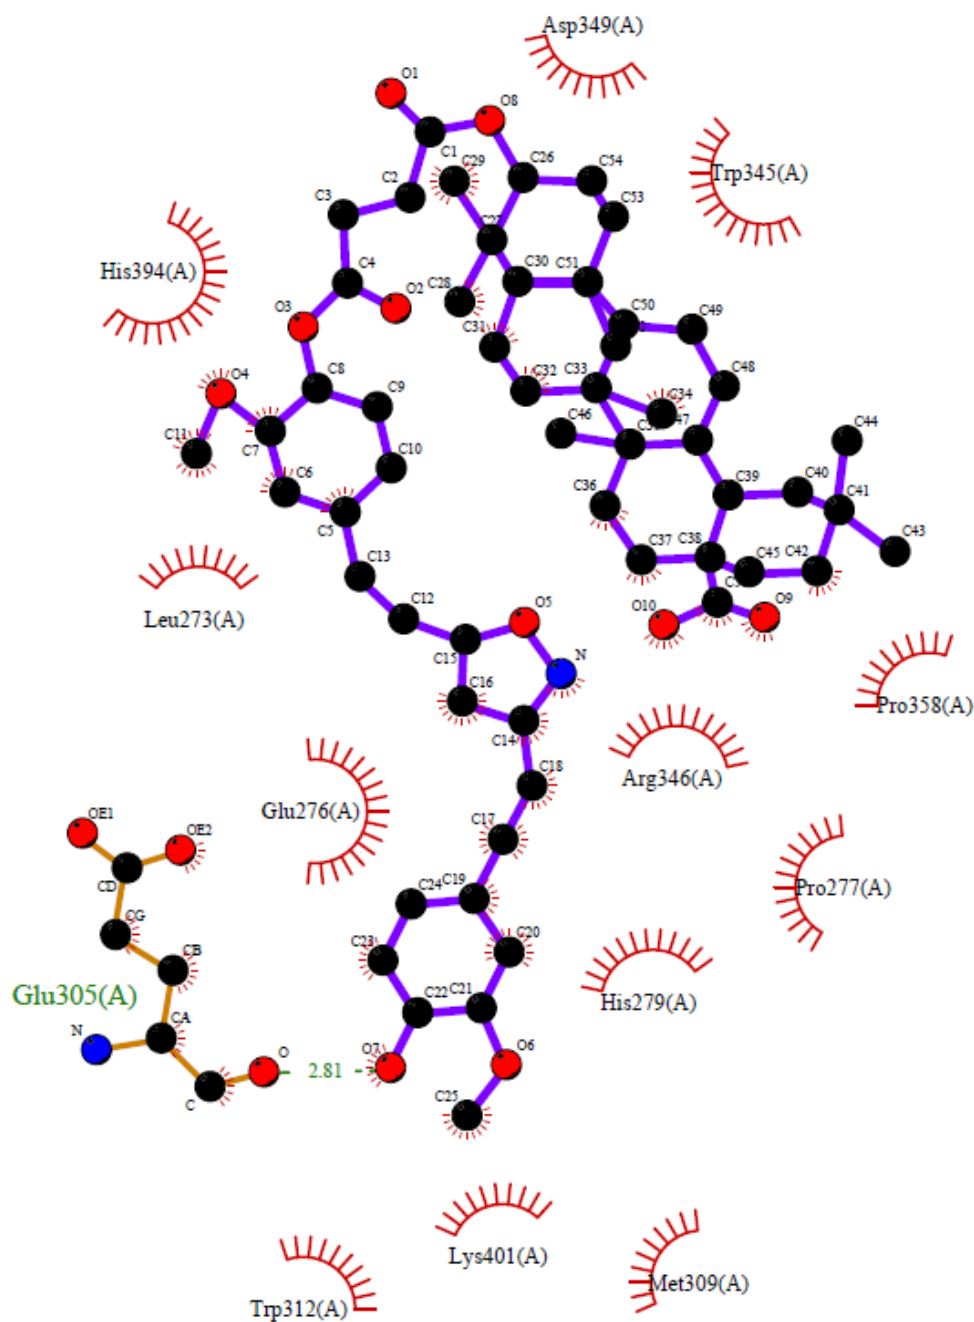

**Figure S32** The first poses of the docked ligands to compound **KS6**; hydrogen atoms are omitted; 112j.pdb protein (LigPlot+ v.2.2 software).

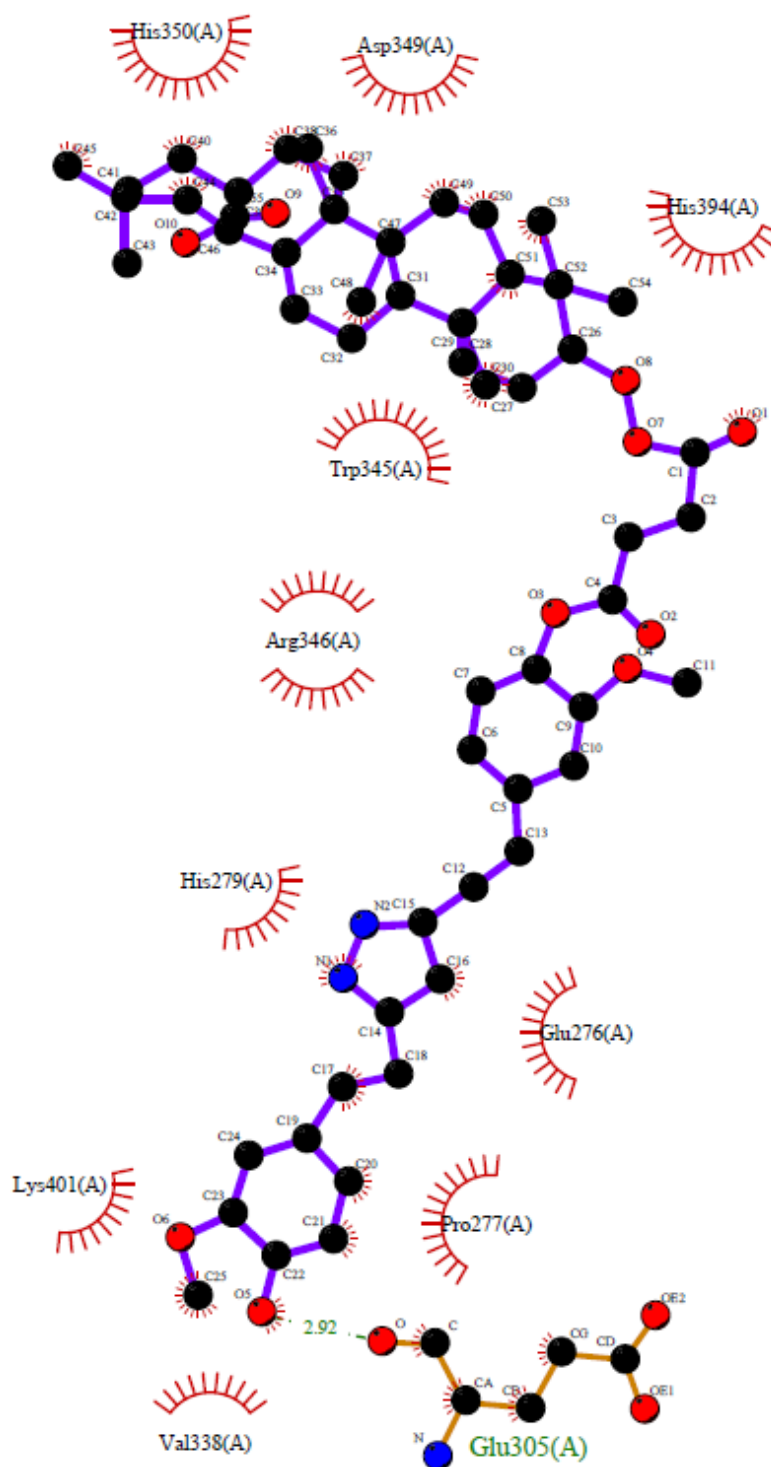

**Figure S33** The first poses of the docked ligands to compound **KS6**; hydrogen atoms are omitted; 112j.pdb protein (LigPlot+ v.2.2 software).

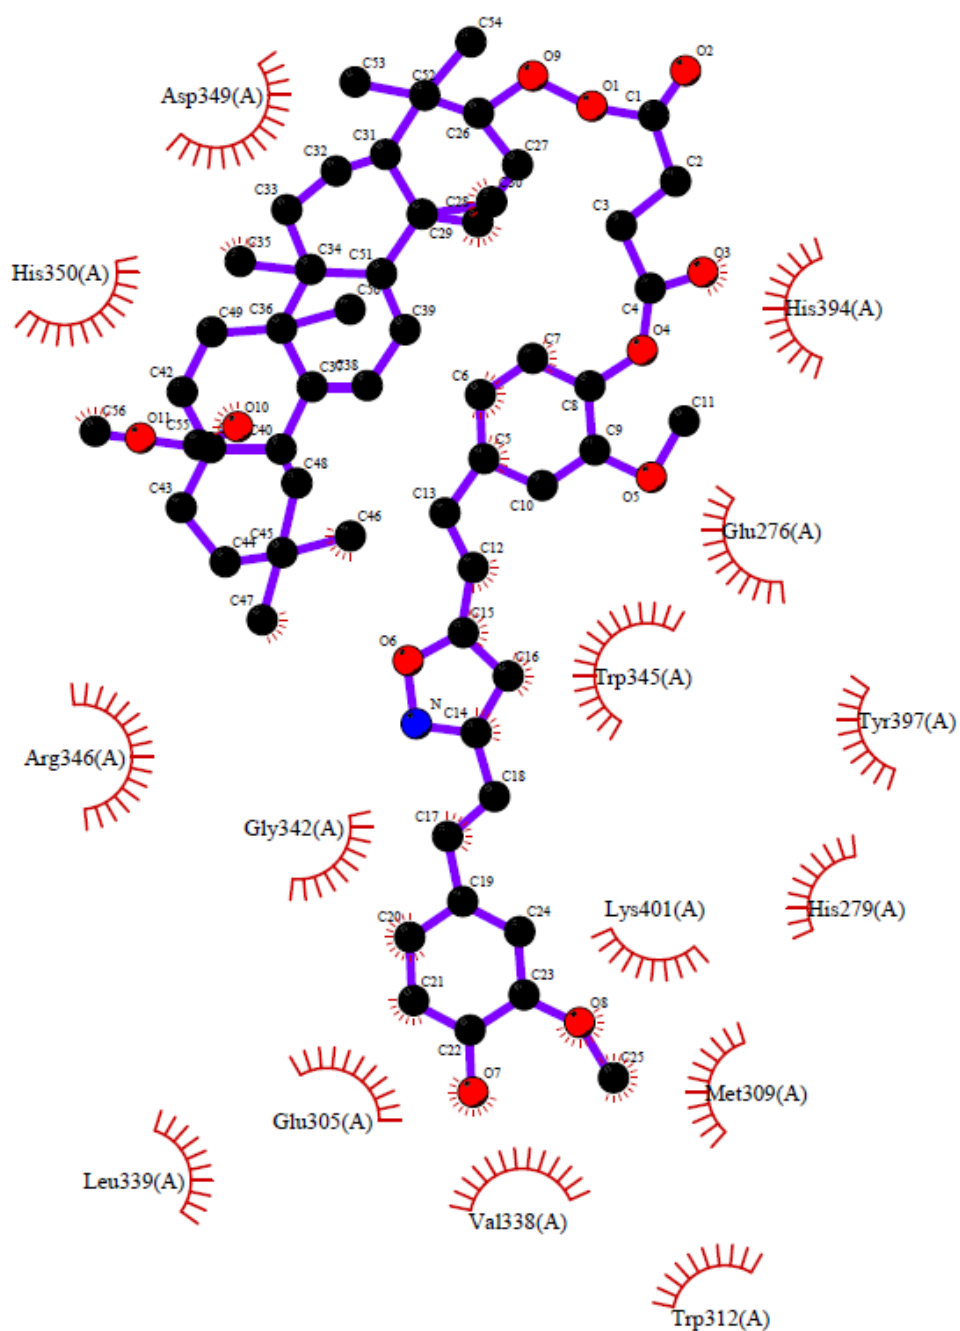

**Figure S34** The first poses of the docked ligands to compound **KS7**; hydrogen atoms are omitted; 112j.pdb protein (LigPlot+ v.2.2 software).



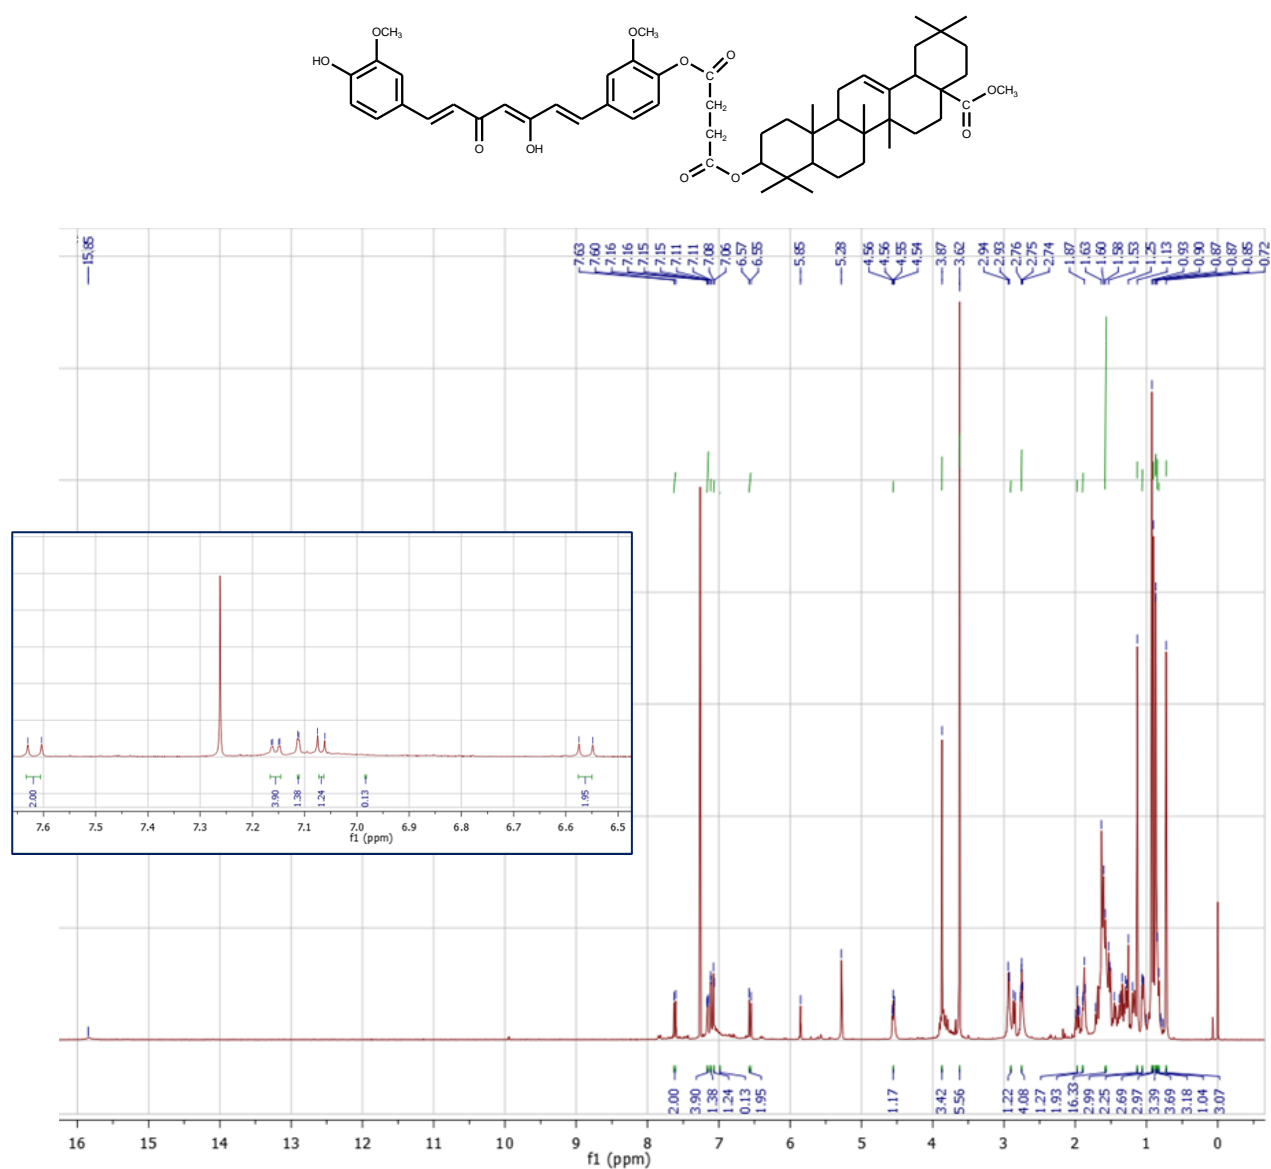

**Figure S36** <sup>1</sup>H-NMR spectrum of Curcumin mono-oleanoyl hydrogen succinate methyl ester

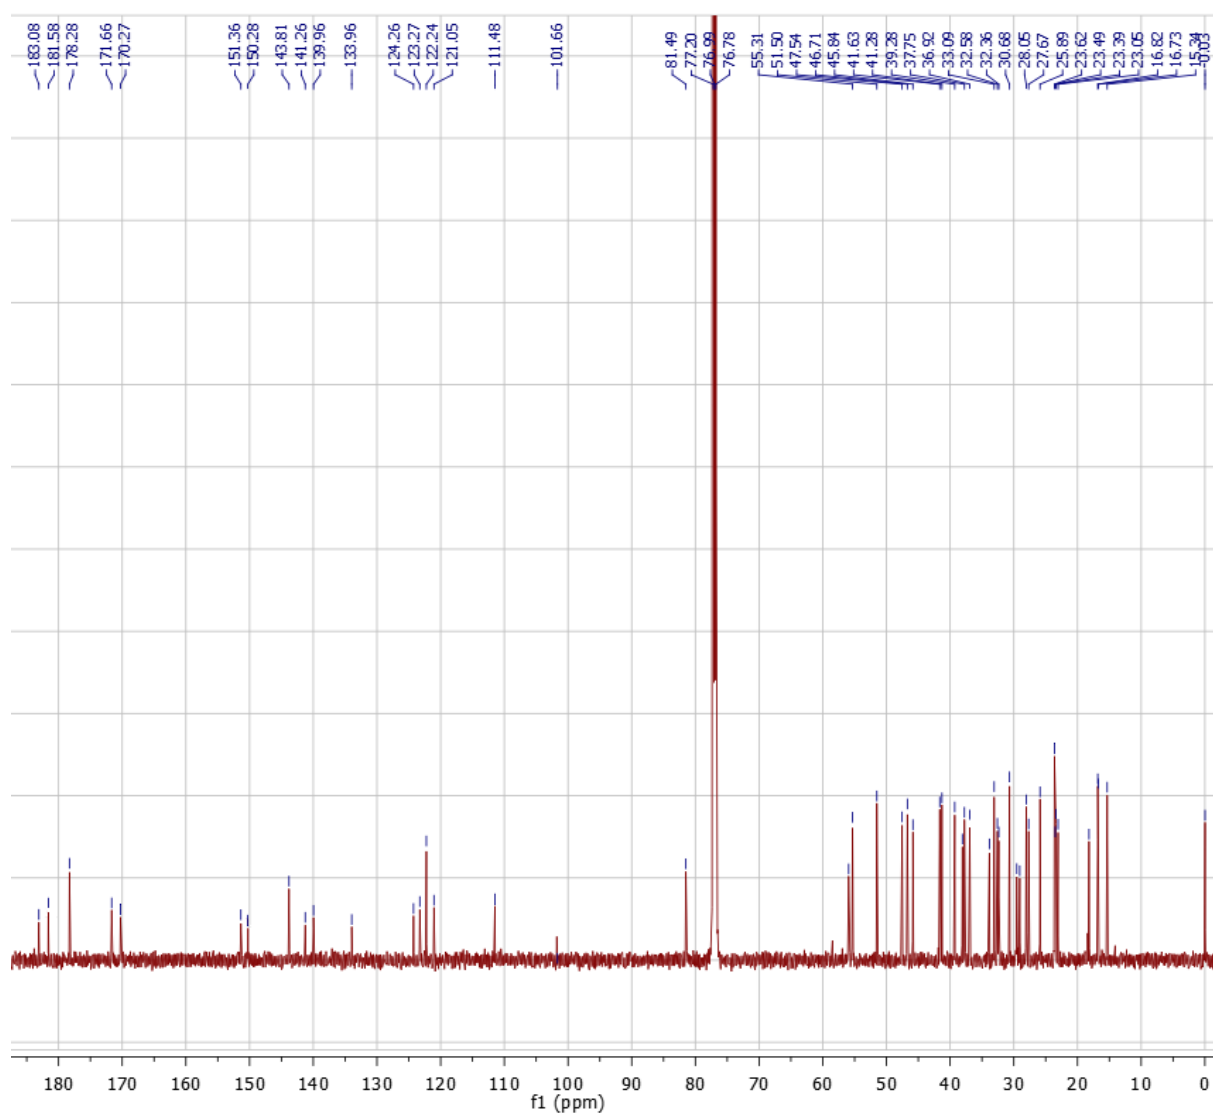

**Figure S37**  $^{13}\text{C}$ -NMR spectrum of Curcumin mono-oleanoyl hydrogen succinate methyl ester

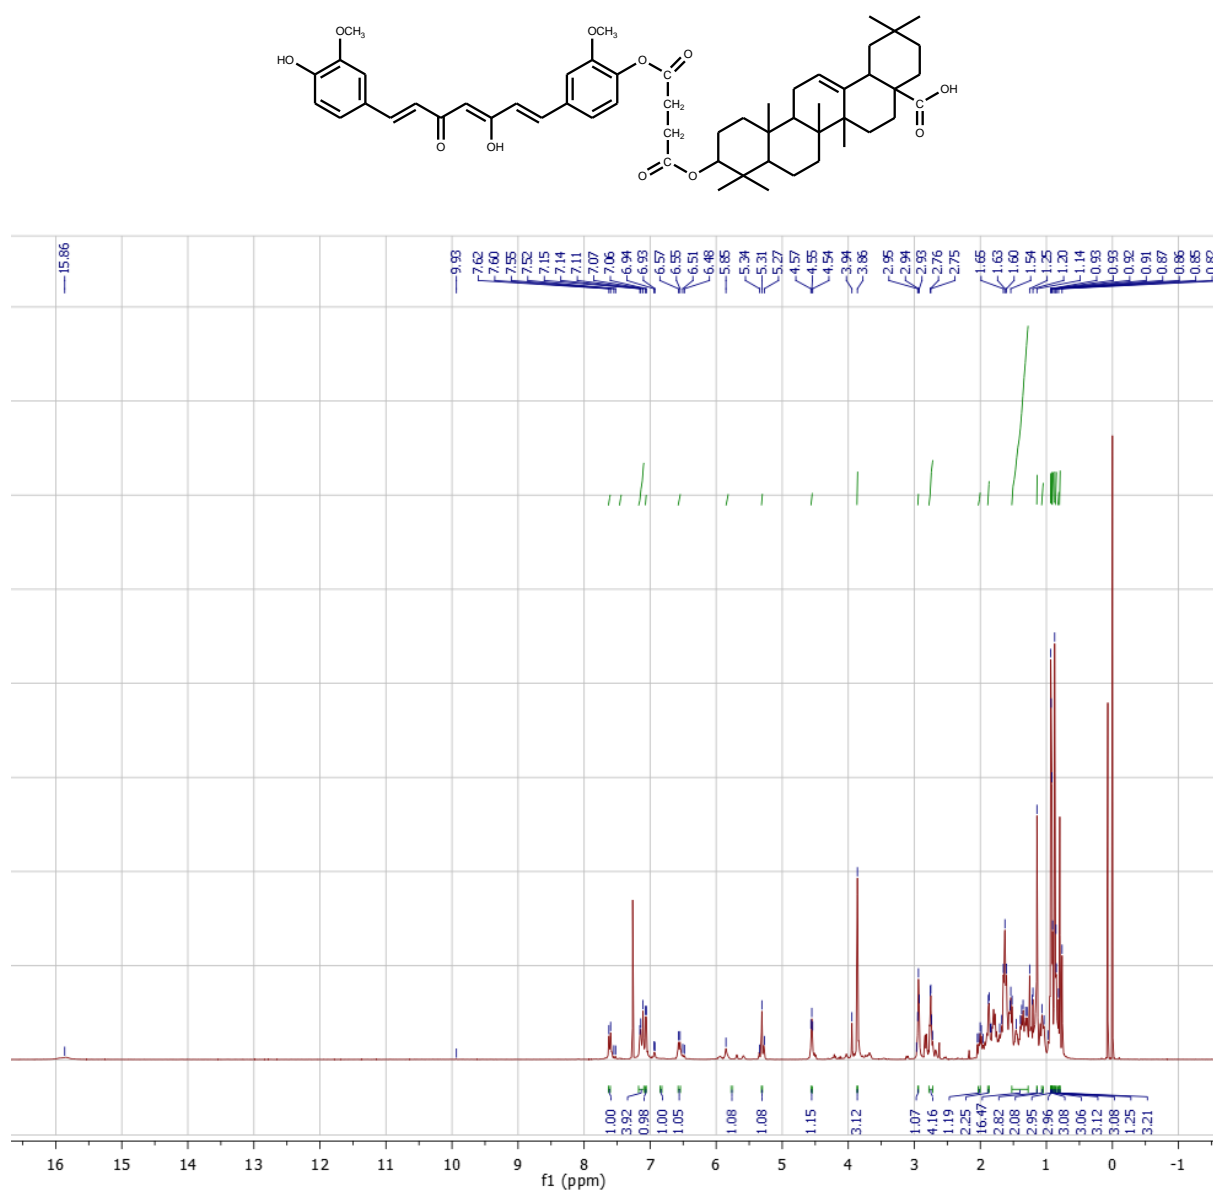

**Figure S38**  $^1\text{H}$ -NMR spectrum of Curcumin mono-oleanoyl hydrogen succinate

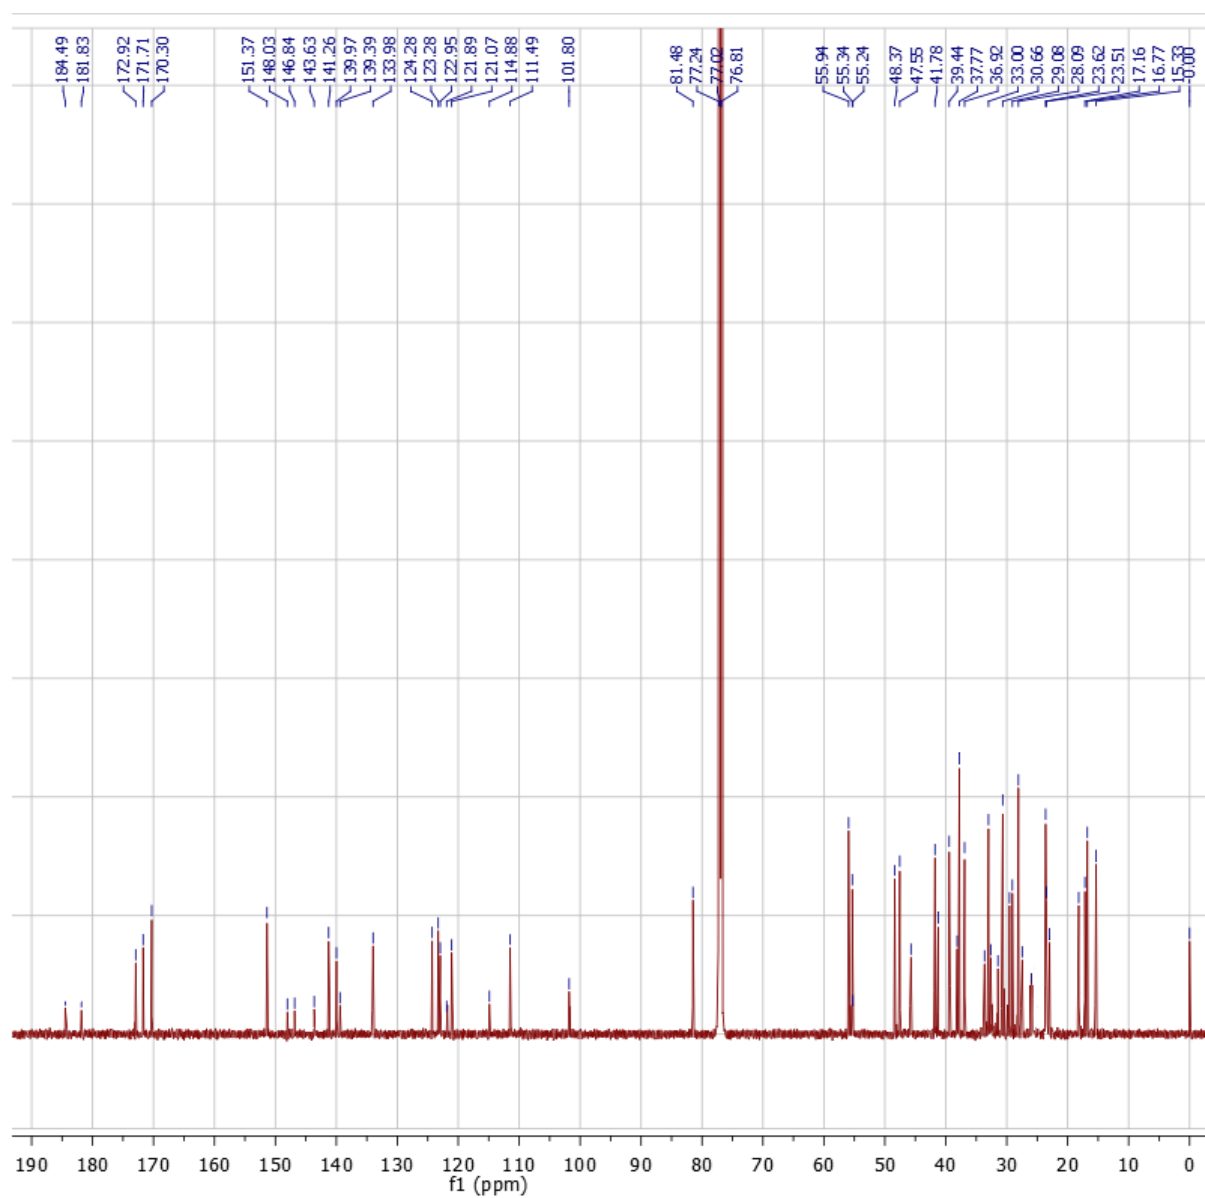

**Figure S39** <sup>13</sup>C-NMR spectrum of Curcumin mono-oleanoyl hydrogen succinate

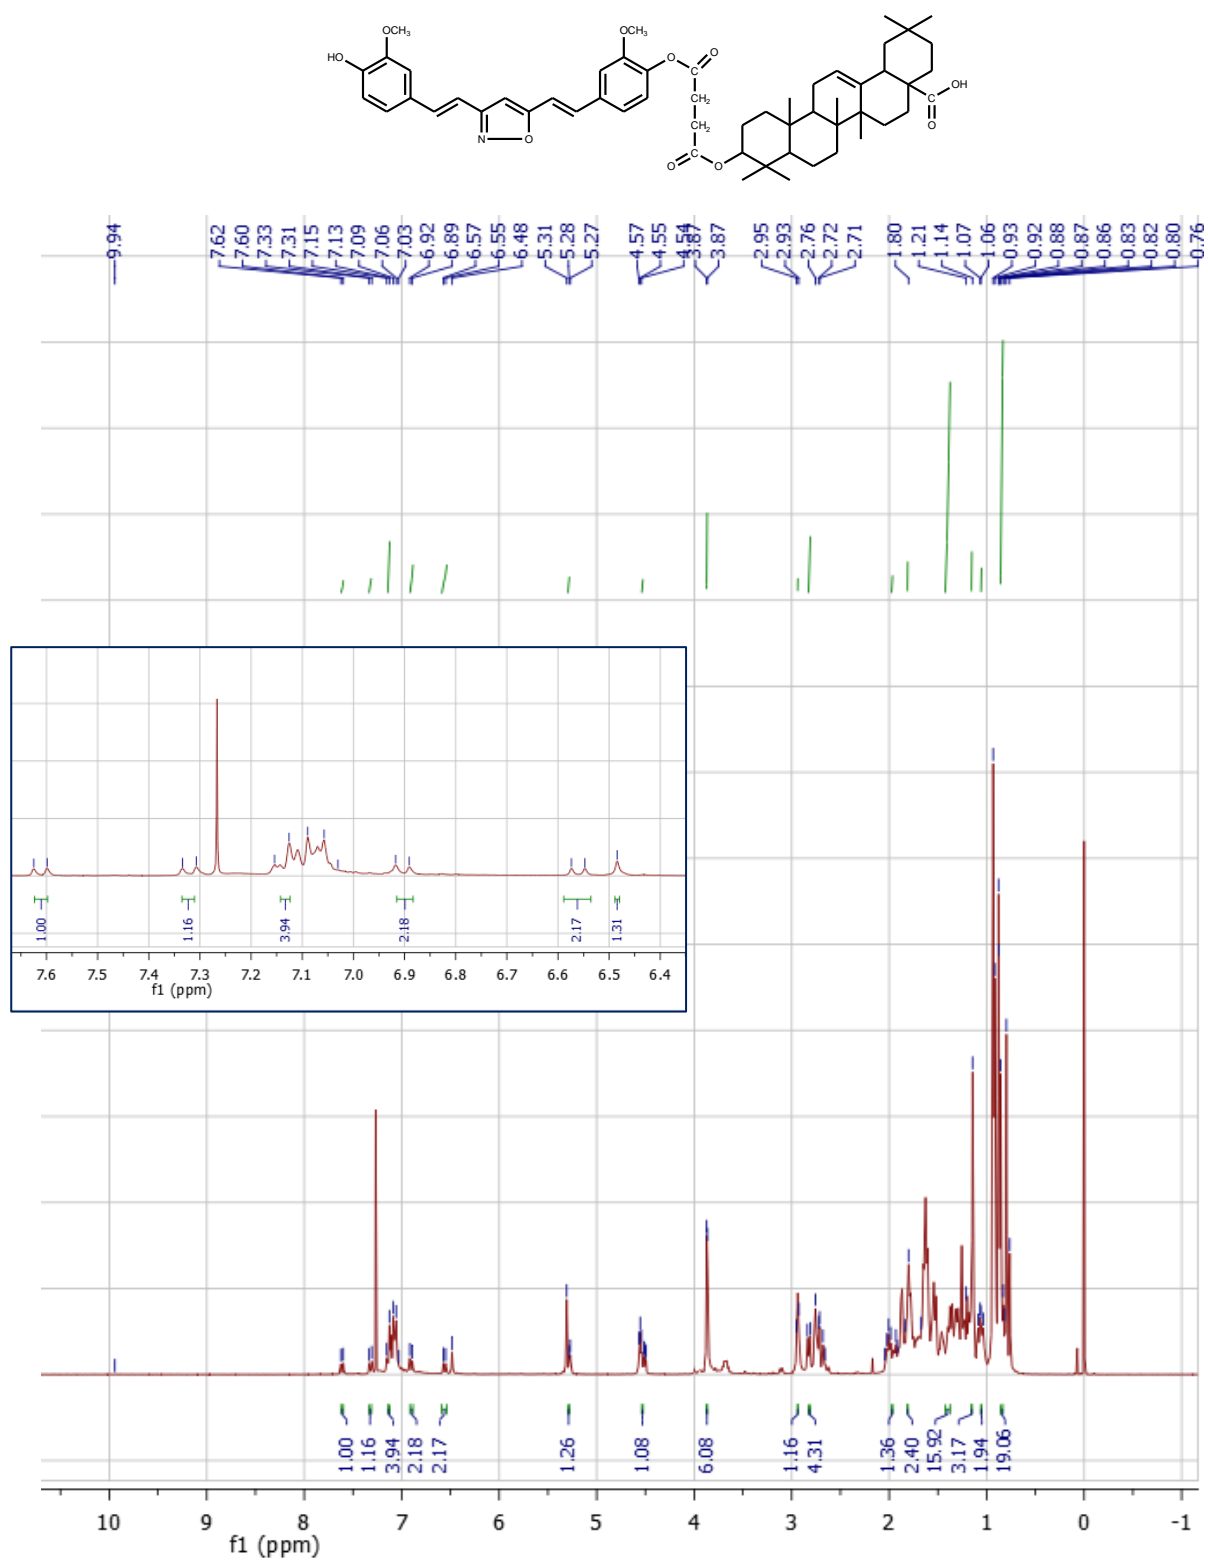

**Figure S40**  $^1\text{H}$ -NMR spectrum of Curcumin isoxazole mono-oleanoyl hydrogen succinate

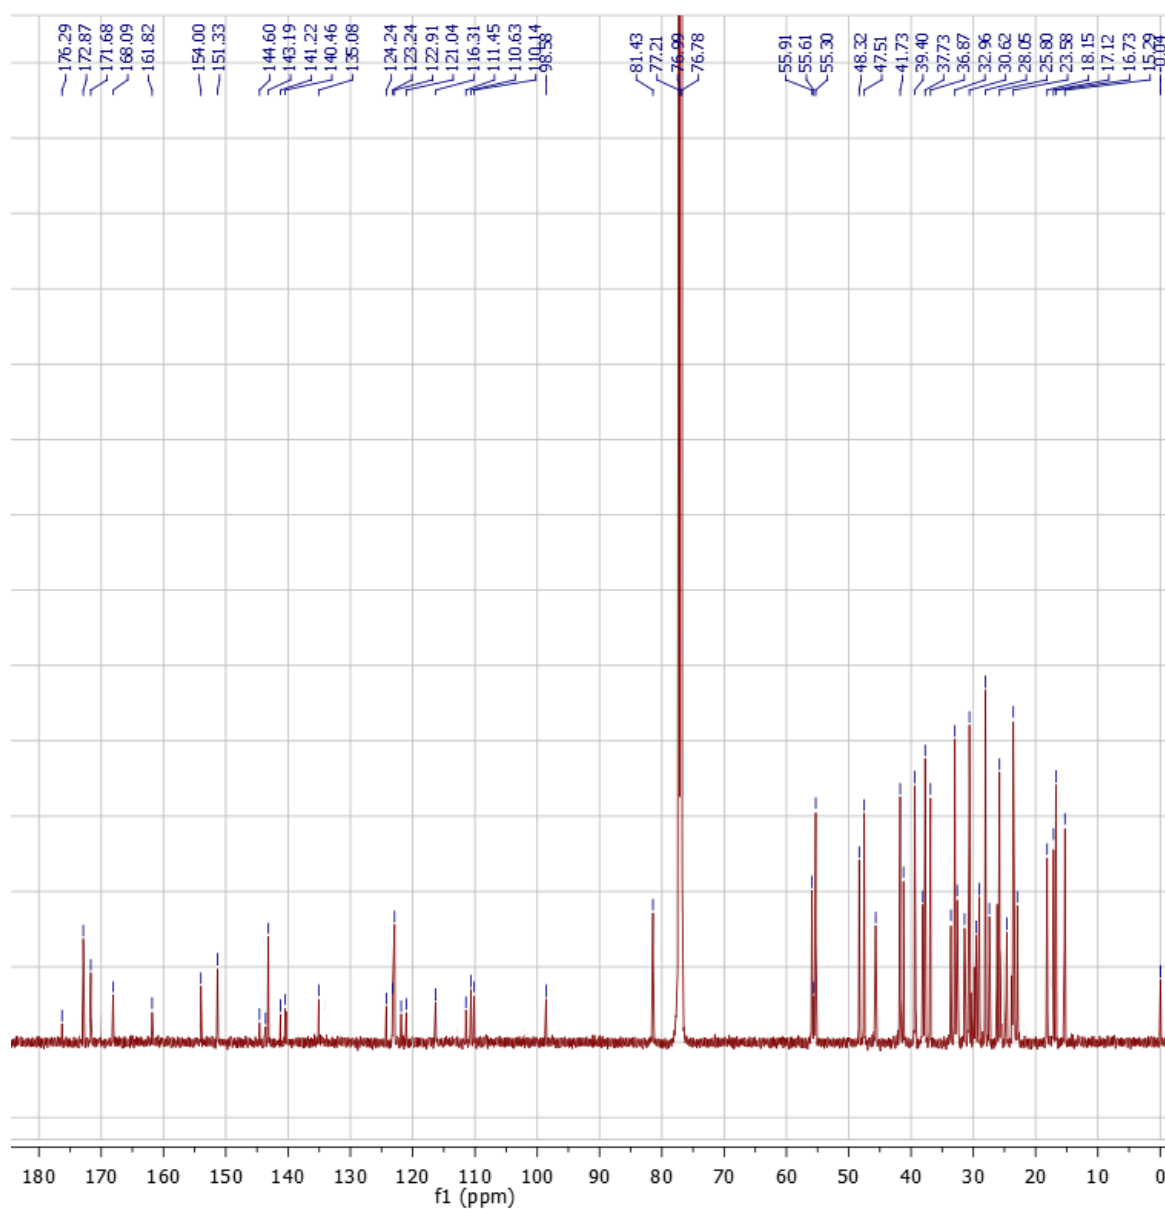

**Figure S41**  $^{13}\text{C}$ -NMR spectrum of Curcumin isoxazole mono-oleanoyl hydrogen succinate



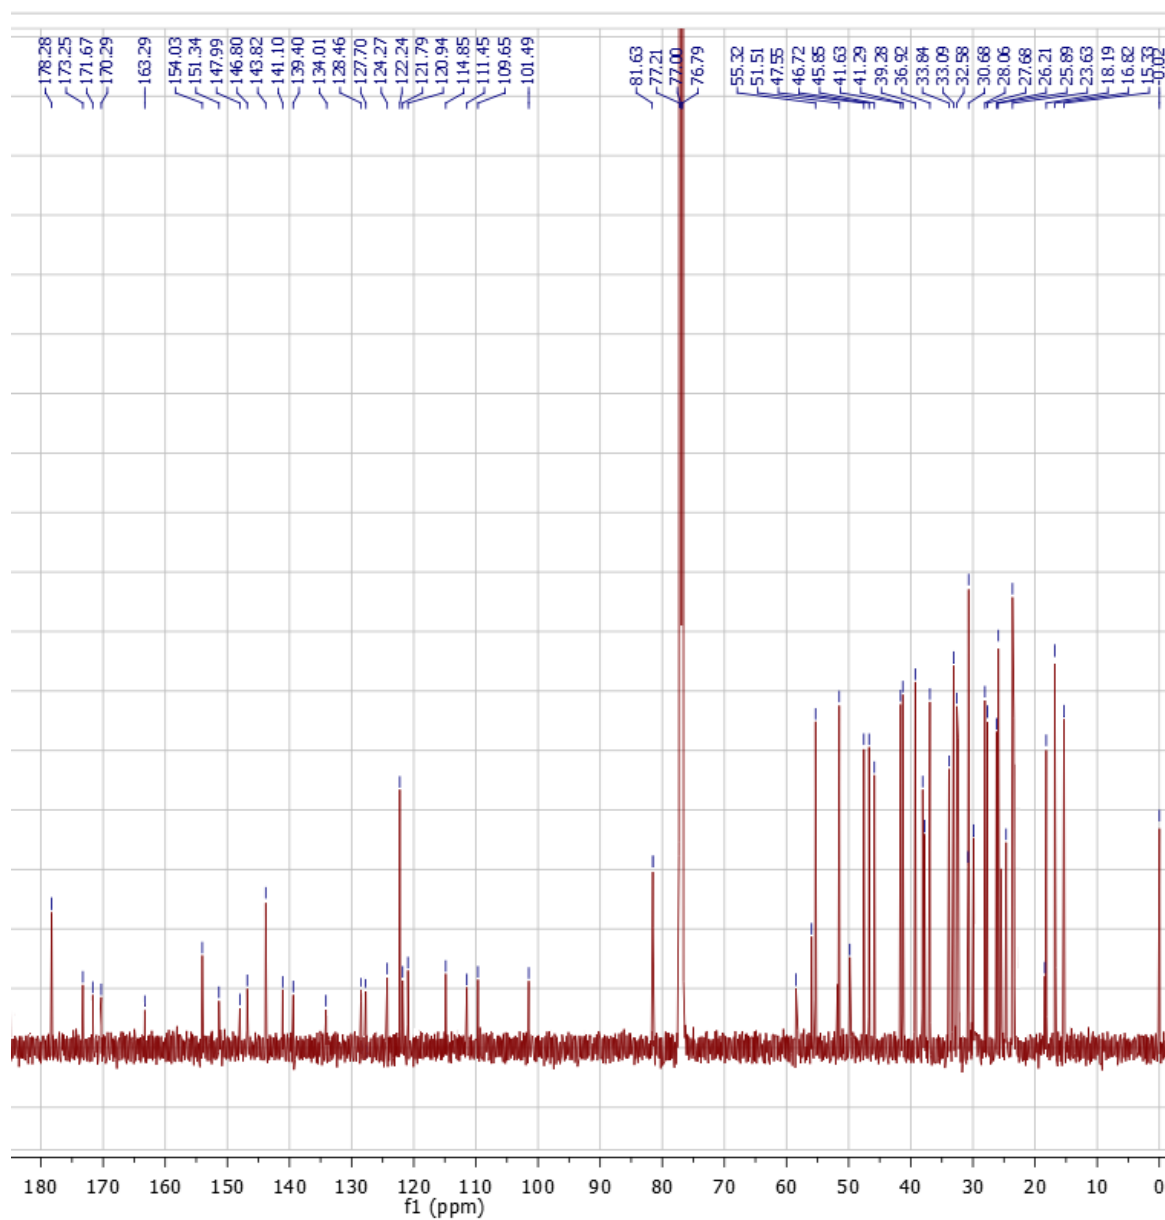

**Figure S43**  $^{13}\text{C}$ -NMR spectrum of Curcumin isoxazole mono-oleanoyl hydrogen succinate methyl ester
